1 Running heading: Cynodont pectoral limb musculoskeletal anatomy

2  
3 **Title: Three-dimensional mobility and muscle attachments in the pectoral limb of**  
4 **the Triassic cynodont *Massetognathus pascuali***

5  
6 Phil H. Lai<sup>1,2\*</sup>, Andrew A. Biewener<sup>2</sup>, Stephanie E. Pierce<sup>1\*</sup>

- 7 1. Museum of Comparative Zoology and Department of Organismic and Evolutionary Biology,  
8 Harvard University, Cambridge, MA 02138, USA  
9 2. Concord Field Station and Department of Organismic and Evolutionary Biology, Harvard  
10 University, Bedford, MA 01730, USA

11  
12 \*Corresponding author: Phil H. Lai ([phillai@g.harvard.edu](mailto:phillai@g.harvard.edu)) and Stephanie E. Pierce  
13 ([spierce@oeb.harvard.edu](mailto:spierce@oeb.harvard.edu))

14  
15 **ABSTRACT**

16 The musculoskeletal configuration of the mammalian pectoral limb has been heralded as a key  
17 anatomical feature leading to the adaptive radiation of mammals, but limb function in the cynodont  
18 outgroup remains unresolved. Conflicting reconstructions of abducted and adducted posture are based  
19 on mutually-incompatible interpretations of ambiguous osteology. We reconstruct the pectoral limb of the  
20 Triassic non-mammalian cynodont *Massetognathus pascuali* in three dimensions, by combining skeletal  
21 morphology from micro-computed tomography with muscle anatomy from an extended extant  
22 phylogenetic bracket. Conservative tests of maximum range of motion suggest a degree of girdle mobility,  
23 as well as substantial freedom at the shoulder and the elbow joints. The glenoid fossa supports a neutral  
24 pose in which the distal end of the humerus points 45° posterolaterally from the body wall, intermediate  
25 between classically “sprawling” and “parasagittal” limb postures. *Massetognathus* is reconstructed as  
26 having a near-mammalian complement of shoulder muscles, including an incipient rotator cuff (m.  
27 subscapularis, m. infraspinatus, m. supraspinatus, and m. teres minor). Based on close inspection of the  
28 morphology of the glenoid fossa, we hypothesize a posture-driven scenario for the evolution of the therian  
29 ball-and-socket shoulder joint. The musculoskeletal reconstruction presented here provides the  
30 anatomical scaffolding for more detailed examination of locomotor evolution in the precursors to  
31 mammals.

32  
33 **Keywords:** shoulder girdle; forelimb; synapsids; mammals; range of motion; musculoskeletal function;  
34 postural evolution.

35  
36 **INTRODUCTION**

37 Today’s mammals inhabit disparate ecological niches, comprising cursorial, fossorial, aquatic, and even  
38 volant forms (Vaughan et al. 2013; Hildebrand, 1989; Fischer et al. 2002). These varied lifestyles are  
39 supported by modifications of the pectoral limb into anatomical structures as diverse as wings and  
40 flippers. The evolution of the mammalian-style pectoral limb—mobile scapula, ball-and-socket  
41 glenohumeral joint, “parasagittal” limb posture—has been suggested as a key innovation leading to the  
42 adaptive radiation of the clade (Polly, 2007). Morphological diversification of this anatomical module  
43 began early on in mammalian evolution (Meng et al. 2006; Ji et al. 2006), predating the emergence of the  
44 crown group (Luo, 2007). Accordingly, interpreting morphological and functional transformation of the  
45 pectoral limb in the sister group to mammals is key to understanding their remarkable success.

46  
47 The non-mammalian cynodonts offer a glimpse at an intermediate stage in mammalian locomotor  
48 evolution. The osteology of the cynodont pectoral girdle and forelimb is well known from the fossil record,  
49 and does not appear to have been particularly disparate; in a series of papers, Jenkins (1970a, 1971a)  
50 synthesized a number of descriptions and posited that most cynodonts shared a common appendicular  
51 morphology, and presumably similar locomotor behaviors. In contrast to the hip articulation, where a  
52 socket-like acetabulum clearly circumscribed range of motion (Jenkins, 1971a), the cynodont gleno-  
53 humeral joint possessed the relatively unconstrained, hemisellar architecture on which late Permian  
54 archosaurs, lepidosaurs, and synapsids converged (Jenkins, 1993)—the typical mammalian ball-and-  
55 socket articulation did not appear until the Jurassic theriomorphs (Ji et al. 1999; Luo, 2015). Multiple

56 reconstructions of the cynodont pectoral limb have been advanced, drawing on skeletal morphology  
57 (Watson, 1917; Jenkins, 1970b, 1971a; Kemp, 1980a, 1980b; Oliveira & Schultz, 2016) as well as muscle  
58 anatomy as inferred from osteology and homology to extant taxa (Gregory & Camp, 1918; Romer, 1922).

59  
60 Two competing hypotheses of cynodont posture and locomotion have emerged, with discrepancies  
61 centered on divergent interpretations of shoulder mobility, and the position occupied along the classic  
62 sprawling-to-upright continuum of tetrapod posture (Reilly & Elias, 1998; Gatesy, 1991). A cornerstone of  
63 the upright, or adducted postural view, is Jenkins' work on *Massetognathus pascuali*, a traversodontid  
64 cynodont from the Triassic Chañares Formation of Argentina (Romer, 1967; Jenkins, 1970b). As a  
65 member of Cynognathia, the sister group to the probainognathians that gave rise to mammals (Ruta et al.  
66 2013), *Massetognathus* represents one of the last steps on the mammal stem, as well as a reasonable  
67 exemplar of early Mesozoic cynodont anatomy (Liu & Olsen, 2010). Based on the postcranial skeleton of  
68 *Massetognathus*, Jenkins advanced a two-dimensional reconstruction in a crouched, adducted pose with  
69 posteriorly-directed elbows, reminiscent of a small, short-limbed therian (Jenkins, 1970b). Working from  
70 cynognathian (*Cynognathus*) and probainognathian (*Trucidocynodon*) material, Watson (1917) and  
71 Oliveira and Schultz (2016) arrived at similarly therian-like interpretations of posture and locomotion  
72 across eucynodonts.

73  
74 On the other hand, Kemp's (1980a, 1980b) reconstructions of the basal Late Permian cynodont  
75 *Procynosuchus* and the Middle Triassic traversodontid *Luangwa* depicted the sprawling, abducted  
76 posture thought to be plesiomorphic for amniotes. The humerus is held perpendicular to the animal's  
77 sagittal plane, and the main stride component is furnished by protraction and retraction of the humerus  
78 around a dorsoventral axis. Kemp posited that the basic structure and function of the forelimb remained  
79 unchanged between the Permian and Triassic cynodonts, and that the limb and girdle transformations  
80 leading to adducted posture were restricted to later, more crownward taxa. The close phylogenetic  
81 relationship between *Massetognathus* and *Luangwa* (Liu & Abdala, 2014) means that we currently have a  
82 reconstruction with abducted posture in one traversodontid, and adducted posture in another. The  
83 equivocal osteology of the cynodont pectoral girdle has so far precluded consensus on forelimb function,  
84 hindering a deeper understanding of locomotor evolution in this important clade.

85  
86 Here we revisit cynodont forelimb morphology and function using modern computational methods to add  
87 a third dimension (3D) to this classic problem. Using digital models of fossil material derived from micro-  
88 computed tomography ( $\mu$ CT), we interactively assess articular function at the shoulder and elbow joints  
89 (e.g. Pierce et al. 2012; Nyakatura et al. 2015). Further, we reconstruct the origins and insertions of the  
90 shoulder musculature using an updated, extended extant phylogenetic bracket, and map them onto the  
91 3D pectoral limb skeleton of *Massetognathus*. The result is a robust, three-dimensional reconstruction  
92 that will form the basis of future biomechanical analyses using musculoskeletal modeling techniques (e.g.  
93 Bates & Schachner, 2012; Hutchinson et al. 2005; Hutchinson et al. 2015) to probe the link between  
94 skeletal motion and muscle function.

## 95 96 **MATERIALS AND METHODS**

### 97 **$\mu$ CT scanning and segmentation**

98 A nodule containing the nearly-complete, articulated remains of *Massetognathus pascuali* (MCZ 3691)  
99 was scanned using a Nikon Metrology (X-Tek) HMXST225 MicroCT unit located at Harvard University's  
100 Center for Nanoscale Systems. Scanning parameters were 175kV 46 $\mu$ A, with a 0.01mm copper filter and  
101 a final voxel size of 127.22  $\mu$ m. The  $\mu$ CT data were imported into Mimics v18 (Materialise NV, Leuven,  
102 Belgium) for segmentation. Pectoral girdle (interclavicle, clavicles, scapulocoracoids) and forelimb  
103 (humeri, radii, ulnae) skeletal elements were identified and assigned individual masks, from which high-  
104 resolution 3D meshes were computed and exported for smoothing and repair (Fig. 1).

### 105 106 **Bone repair**

107 The pectoral limb exhibited no overall distortion, but certain bones had suffered taphonomic  
108 fragmentation, necessitating repairs to their digital models. Fragments were manually aligned, using  
109 contralateral elements as reference. In the case of the humerus, radius, and clavicle, damage to opposing  
110 ends of the left- and right-side elements was remedied by taking the intact end of one element, mirroring  
111 it, and grafting it onto the opposing end of its counterpart. Small gaps were filled using the "Wrap" and

112 “Surface Reconstruction” algorithms in 3-Matic v10 (Materialise NV, Leuven, Belgium), while larger  
113 breaks were bridged and smoothed over using digital sculpting tools in Autodesk Mudbox (Autodesk, Inc.,  
114 San Rafael, CA, USA). As we were unable to locate all of the fragments of the interclavicle, we modeled  
115 missing segments based on the preserved cranial portion, other interclavicles in the MCZ collections, and  
116 Jenkins’ (1970b, 1971a) description of the same element in other cynodonts.

117  
118 The repaired bone meshes were smoothed and re-wrapped in MeshLab (ISTI-CNR, Pisa, Italy), to  
119 eliminate artifacts introduced in scanning and segmentation, while preserving potentially informative  
120 surface texture. To reduce noise, we performed a Poisson surface reconstruction (Hoppe, 2008), which  
121 takes the vertex coordinates of the original mesh and outputs an optimized, re-triangulated mesh. We  
122 then applied a single Laplacian smoothing step (Field, 1988) to correct any remaining polygonal  
123 irregularities, and exported the finished meshes in Wavefront .OBJ format (Wavefront Technologies,  
124 Santa Barbara, CA, USA) for examination and assembly.

### 126 **Re-articulation and rigging**

127 Using 3DS Max (Autodesk, Inc., San Rafael, CA, USA), centers of rotation for the acromio-clavicular,  
128 humero-radial, and humero-ulnar joints were determined by fitting spherical primitives to their opposing  
129 articular surfaces and then superimposing the spheres’ centroids in 3D space (“

130 2). A cylinder was used to model the planar clavo-interclavicular joint, and an ellipsoid of aspect ratio  
131 24:13 was used to model the gleno-humeral joint. Thus articulated, the pectoral girdle and forelimb  
132 skeleton were organized as a kinematic hierarchy, wherein each bone was subordinated to the reference  
133 frame of its proximal neighbor, and inherited all rotations and translations applied to the latter.

134  
135 A local joint coordinate system (JCS) (Grood & Suntay, 1983) was defined for each articulation, with joint  
136 axes positioned to reflect anatomically-informative rotations. Axes were oriented following the XYZ  
137 rotation order convention, with Z capturing the axis of greatest expected mobility and X the least (Brainerd  
138 et al. 2010).

### 139 140 **Range of motion testing**

141 Limb joint range of motion has been shown to be sensitive to assumptions of intra-joint spacing (Arnold et  
142 al. 2014; Nyakatura et al. 2015; Pierce et al. 2012). To circumscribe this, we established an articular  
143 cartilage thickness of 0.25 mm based on relationships for mammalian articular cartilage (Simon, 1970).  
144 Assuming equal cartilage thickness on opposing articular surfaces, we modeled every joint with a total  
145 joint space of 0.50 mm. This value is supported by the *in situ* spacing between limb elements in the fossil  
146 specimen, and yielded good agreement between the curvature of opposing articular surfaces.

147  
148 Osteological limits to joint motion were assessed by rotating the distal element of each joint until it  
149 collided with another bony surface, and repeating in the opposite direction to give total osteological range  
150 of motion around each axis. The clavo-interclavicular, acromio-clavicular, humero-radial, and humero-  
151 ulnar joints were tested only in rotation, but the unusual morphology of the gleno-humeral joint has been  
152 suggested to support coordinated translation and rotation, in the form of sliding (Jenkins, 1971a) or rolling  
153 (Kemp, 1980b) kinematics. Accordingly, we opted to compare purely rotational range of motion at this  
154 joint against combined translation-rotation. To do so, we imported the *Massetognathus* model into SIMM  
155 (Software for Interactive Musculoskeletal Modeling: Delp & Loan, 1995) and defined kinematic functions  
156 linking rotations around X, Y and Z (Fig. 2) with translations along those same axes. The functions were  
157 tuned to maintain a constant 0.5mm offset between the humeral head and the glenoid fossa, as  
158 determined via collision between a second, larger ellipsoid primitive and the surface of the glenoid fossa.  
159 Due to the unconstrained morphology of the glenoid fossa, we found that extremes of gleno-humeral  
160 rotation could result in disarticulation of the joint well before a collisional limit was reached. To establish  
161 reasonable physiological limits for this joint, we defined a secondary constraint criterion of 50% humeral  
162 head contact with the glenoid fossa. Results of range of motion testing are given in Table 1.

163  
164 A neutral reference pose was defined, allowing joint rotations to be repeatedly measured and compared  
165 (Brainerd et al. 2010; Gatesy et al. 2010). The gleno-humeral joint was rotated to the center of its  
166 measured ranges of motion (Fig. 3). Doing so placed the approximate centroids of the glenoid fossa and  
167 the humeral head in apposition, as has been hypothesized to best approximate *in vivo* utilization of joint

168 surfaces during locomotion (Fischer, 1994). The humero-radial and humero-ulnar joints were then rotated  
169 to orient the antebrachium normal to the “substrate”.

170

### 171 **Shoulder muscle reconstruction**

172 Prior reconstructions of cynodont musculature have used monotremes (Gregory & Camp, 1918) as well  
173 as saurians and therians (Romer, 1922; Jenkins, 1971b) as bookends to examine conservation and  
174 transformation in muscle anatomy through mammal evolution. Following this practice, we defined an  
175 extended Extant Phylogenetic Bracket (Witmer, 1995) encompassing a range of amniotes, and using  
176 salamanders as an outgroup (see Table 2 for the full list of taxa). Due to the rarity of articulated cynodont  
177 carpi and the paucity of well-delineated attachment sites on the radius and ulna, past studies have largely  
178 focused on muscles crossing the shoulder joint. In the interest of parsimony and repeatability, we follow  
179 suit in limiting our set of muscles under consideration to only those that span the gleno-humeral joint. This  
180 metric excludes the extrinsic scapular muscles (such as m. serratus anterior, m. trapezius, and mm.  
181 rhomboidei) that originate on the axial skeleton and insert on the shoulder girdle, as well as the various  
182 flexors, extensors, pronators, and supinators that originate on the distal humerus and actuate the distal  
183 forelimb. M. latissimus dorsi and mm. pectorales have insertions on the humerus, and were included in  
184 the analysis despite their origins on the axial skeleton, due to their presumed first-order action on the  
185 brachium.

186

187 Muscle origins and insertions were taken from the primary literature (see Table 2 for list of references),  
188 and reconstructed as likely present in *Massetognathus* (level I inference *sensu* Witmer, 1995) or possibly  
189 present (level II inference). None of the muscles under consideration were determined to be likely absent  
190 (level III inference). Bryant and Seymour’s (1990) study of carnivorans was used as a reference for  
191 muscle attachment type (direct/fleshy, aponeurotic, or tendinous). Absence of clear osteological  
192 correlates was not considered grounds for elimination, as muscles inserting directly into periosteum may  
193 not leave a mineralized scar (Bryant & Seymour, 1990). In the absence of bony scars, we placed  
194 attachments on homologous regions of the bone (Holliday, 2009). Muscles were homologized with  
195 reference to Abdala and Diogo (2010) and Diogo et al. (2009). Reconstructed muscle attachment areas  
196 were then digitally painted onto the 3D bone meshes using Autodesk Mudbox, for visualization and  
197 comparison.

198

## 199 **RESULTS**

### 200 **Neutral reference pose**

201 Digitally reassembling the pectoral limb into a neutral reference pose (Fig. 3) places the diaphysis of the  
202 humerus at approximately 45° to the animal’s body wall, with the proximal and distal articular surfaces in  
203 roughly the same horizontal plane. The anteriorly-oriented scapulocoracoid, posterolateral placement of  
204 the glenoid fossa, and caudally-pointing elbows of this pose are broadly consistent with Watson’s (1917),  
205 Jenkins’ (1971a), and Kemp’s (1980a) reconstructions of traversodontid pectoral girdles/limbs.

206

207 Jenkins (1971a) contested Watson’s (1917) reconstruction of the cynodont pectoral girdle, arguing that  
208 angling the scapulocoracoids medially and cranially would force the humerus into a mechanically  
209 untenable posture while compromising the weight-bearing suspensory function of the extrinsic scapular  
210 musculature. Jenkins’ reconstruction orients the scapulocoracoids more vertically and tilts them outward  
211 from the midline; as a result, the glenoid fossae are directed more ventrally than in Watson’s  
212 reconstruction. Based on our 3D reconstruction, the geometry of the clavicles and interclavicle constrain  
213 the scapulocoracoids such that the glenoid fossae must be oriented posterolaterally and slightly ventrally,  
214 as in Jenkins’ reconstruction.

215

### 216 **Joint range of motion**

217 As reconstructed here, the pectoral limb of *Massetognathus pascuali* has one possible degree of  
218 rotational freedom (DOF) at the clavo-interclavicular joint, up to three at the acromio-clavicular joint, and  
219 three each at the gleno-humeral, humero-radial, and humero-ulnar joints, for a total of 13 DOF. Table 1  
220 presents measured ranges of motion at each joint.

221

222 The clavo-interclavicular articulation lacks the extensive, rigid transverse overlap seen in monotremes  
223 (Luo, 2015), and there are no known instances of synostosis between these elements in



224 *Massetognathus*. The planar geometry of the articular facets limits assessment of mobility at this joint to  
225 medial and lateral rotation of the clavicle around an axis normal to the interclavicle (Figure 2) (Kemp,  
226 1980b). Clavicular elevation-depression and long-axis rotation are improbable, as such movements would  
227 require compressive deformation of a substantial thickness of soft tissue around the joint.

228  
229 Some degree of mobility at the acromio-clavicular articulation has been hypothesized (Kemp, 1980b), but  
230 the extent of this is difficult to assess in our 3D model of *Massetognathus* as the acromion is small and  
231 possibly incomplete. Although the minimally-projecting acromion observed in MCZ 3691 is consistent with  
232 Jenkins' (1971a) and Kemp's (1980a) descriptions of eucynodont scapulocoracoids, Liu (2007)  
233 documented several traversodontid scapulocoracoids with more prominent acromions, including a  
234 juvenile *Massetognathus pascuali*. The distal tip of the clavicle likely presents a shallowly, concave  
235 articular surface that is somewhat congruent with the medial surface of the presumptive acromion. We  
236 cautiously propose that some sliding or translational motion may have been possible between the clavicle  
237 and the acromion, allowing pitch, roll, and yaw rotations around the acromio-clavicular joint, subject to  
238 soft-tissue constraints.

239  
240 The glenoid fossa is dorsoventrally concave and anteroposteriorly convex, resembling one half of a sellar  
241 joint. The humeral head has an approximately ellipsoidal morphology, with the major axis running  
242 between the greater and lesser tubercles. Rotation appears to be somewhat restricted in the absence of  
243 translation, totalling 40° in abduction-adduction, 30° in retraction-protraction, and 40° in pronation-  
244 supination. By contrast, we found greatly increased mobility around all three rotational axes when  
245 allowing for translation, suggesting—in line with Jenkins (1971a) and Kemp (1980b)—that the gleno-  
246 humeral articulation is a six degree of freedom joint.

247  
248 Moving distally to the elbow, we measured comparable amounts of total flexion-extension for the humero-  
249 radial and humero-ulnar joints (135° for the former, 140° for the latter). Both the radius and the ulna are  
250 capable of some amount of abduction-adduction (80° for the radius, 60° for the ulna), and long-axis  
251 rotation of each of these bones is unrestricted with reference to the neutral pose. In life, interosseous  
252 ligaments and pronator muscles running between the radius and ulna would likely have constrained  
253 independent movement of these two bones, while permitting coordinated pronation and supination within  
254 the maximum osteological ranges established here.

255  
256 **Muscle reconstruction**  
257 The full set of muscles and taxa considered is given in Table 2, along with primary literature references. A  
258 total of 12 muscles were reconstructed for *Massetognathus pascuali*. Individual muscles and their  
259 attachments are discussed in the text below.

260  
261 **M. latissimus dorsi (Fig. 4)**  
262 *M. latissimus dorsi* appears to be plesiomorphic for tetrapods (Romer, 1924), and is present across the  
263 phylogenetic bracket (Table 2). This muscle originates aponeurotically from the dorsal and thoracodorsal  
264 fascia, and sometimes takes multiple costal origins as well (Diogo et al., 2009). It inserts on the  
265 proximodorsal surface of the humeral deltopectoral crest in all cases except for monotremes, where the  
266 insertion follows the deltopectoral crest distally to terminate on the entepicondyle (Gambaryan et al.  
267 2015). *M. latissimus dorsi* in non-mammalian cynodonts is a level I inference, given its presence on both  
268 sides of the bracket. This muscle inserts adjacent to *m. teres major* on a linear area running parallel to the  
269 long axis of the humerus (Fig. 4). Based on *Cynognathus*, Jenkins (1971a) situated the insertion of the  
270 cynodont *m. latissimus dorsi* on a ridge running obliquely across the dorsal surface of the humerus. He  
271 did not identify a corresponding ridge in *Thrinaxodon* or *Massetognathus*, and we are unable to locate this  
272 feature on close examination of the latter. Instead, we follow Watson (1917), Romer (1922) and Kemp  
273 (1980a) in reconstructing a linear insertion for *m. latissimus dorsi* running proximodistally along the  
274 dorsomedial surface of the humerus, terminating on a tuberosity just proximal to the midpoint of the  
275 diaphysis.

276  
277 **M. pectoralis (Figs. 4, 5)**  
278 *M. pectoralis* is present in all extant tetrapods (Table 2). While non-mammals may have multiple *m.*  
279 *pectoralis* heads (Jenkins & Goslow, 1983), the mammalian *pectoralis* complex comprises a cranial,

280 superficial pectoralis major and a caudal, deeper pectoralis minor (Jenkins & Weijs, 1979). In most  
281 mammals, these muscles insert together along the length of the humeral deltopectoral crest, but in some  
282 taxa (including humans) the pectoralis minor inserts separately on the coracoid process of the scapula.  
283 This is certainly a derived condition, and for the purposes of this study we will consider *m. pectoralis* as a  
284 single functional unit, without major or minor divisions. Originating from the ventral midline of all tetrapods  
285 on (where present) the interclavicle, sternal series, and sometimes the medial ends of the costal  
286 cartilages, *m. pectoralis* inserts on the posteroventral surface or apex of the deltopectoral crest in all  
287 cases. *Massetognathus* possesses a prominent deltopectoral crest running slightly more than halfway  
288 along the humeral diaphysis. A “cruciate” interclavicle is plesiomorphic for synapsids (Jenkins, 1971a),  
289 and was considered by Romer (1940) to give origin to a pectoralis complex via the paired fossae on the  
290 posterior ramus. Relative to its length, the interclavicle of *Massetognathus* is considerably broader  
291 mediolaterally than that of pelycosaurs, with a well-marked posterior ramus and ridge that may represent  
292 an expanded attachment for *m. pectoralis* (Romer, 1940; Jenkins, 1971a). We reconstruct *m. pectoralis*  
293 as a level I inference, originating all over the lateral surfaces of the posterior process, across the fossae  
294 on the posterior ramus, and possibly also on the caudally-facing surfaces of the lateral ridge (Fig. 5). *M.*  
295 *pectoralis* inserts as an aponeurosis on the posteroventral surface of the deltopectoral crest of the  
296 humerus, spanning its proximodistal length (Fig. 4).

#### 297 298 **M. deltoideus scapularis and m. deltoideus clavicularis (Figs. 4, 6, 7)**

299 *M. deltoideus* is present in all tetrapods as a scapular division (*m. deltoideus scapularis*) and a clavicular  
300 division (*m. deltoideus clavicularis*), with mammals gaining an additional acromial division (*m. deltoideus*  
301 *acromialis*) (Table 2, homology follows Diogo et al. 2009). The acromion appears to be variably-  
302 developed in *Massetognathus* and other cynodonts, and offers no obvious site for muscle attachment  
303 (Jenkins, 1971a; Kemp, 1978); accordingly, we have reconstructed *Massetognathus* with only the  
304 scapular and clavicular heads common to all tetrapods.

305  
306 Like monotremes, the cynodont scapula has a strongly reflected cranial border (rcb, Fig. 7), which is  
307 probably homologous to the therian scapular spine (Romer, 1922; Jenkins, 1971a; Kemp, 1980a,  
308 Gambaryan et al. 2015). The caudally-facing surface of this border is the likely site of origin for *m.*  
309 *deltoideus scapularis*, in agreement with Gregory and Camp (1918), Romer (1922), and Jenkins (1971a),  
310 but *contra* Kemp (1980a, 1980b), who attributed a broader origin to *m. deltoideus*, covering much of the  
311 lateral surface of the scapula in addition to the reflected border. In living lepidosaurs and crocodylians, *m.*  
312 *deltoideus scapularis* takes origin from the cranial or craniodorsal portions of the lateral scapular surface.  
313 The presence of a pronounced reflected cranial border would functionally divide an *m. deltoideus*  
314 *scapularis* spanning the entire lateral surface of the scapula into a posteriorly-facing portion and a  
315 laterally-facing portion, with uncertain consequences for its resultant line of action. In the absence of any  
316 instances across the phylogenetic bracket of such a functional division, we consider an *m. deltoideus*  
317 *scapularis* origin restricted to the reflected cranial border more biomechanically plausible. As in all other  
318 tetrapods (Table 2), the cynodont *m. deltoideus scapularis* inserts in conjunction with *m. deltoideus*  
319 *clavicularis*, on the anterodorsal surface of the humeral deltopectoral crest (Fig. 4).

320  
321 *M. deltoideus clavicularis* (*sensu* Diogo et al. 2009) originates on the ventral half of the cranial border of  
322 the scapula surrounding the acromion in crocodylians (Meers, 2003), on the interclavicle extending onto  
323 the clavicle in lepidosaurs (Romer, 1922; Jenkins & Goslow, 1983) and monotremes (Howell, 1937a;  
324 Gambaryan et al. 2015), and solely along the length of the clavicle in therians (Parsons, 1896; Stein,  
325 1981; Jenkins & Weijs, 1979). The cranial edge of the clavicle in *Massetognathus* forms a distinct ridge,  
326 which extends into a protruding, anteriorly-directed flange along the distal half of the bone (cf, Fig. 6).  
327 This is the likely origin of *m. deltoideus clavicularis*, though it may also extend ventrally beyond the  
328 clavicle to the area of the scapula surrounding the acromion (not reconstructed). *M. deltoideus*  
329 *clavicularis* inserts with *m. deltoideus scapularis*, on the anterodorsal surface of the humeral deltopectoral  
330 crest (Fig. 4).

#### 331 332 **M. supraspinatus and m. infraspinatus (Figs. 4, 7)**

333 There is some question as to whether *m. supraspinatus* and *m. infraspinatus* were present as separate,  
334 differentiated muscles in non-mammalian cynodonts, though ontogeny shows that both are likely  
335 derivatives of the *m. supracoracoideus* present in non-mammals (Cheng, 1955; Romer, 1956). Some

workers regard the majority of the lateral surface of the cynodont scapula as an infraspinous fossa for the origin of *m. infraspinatus*, with *m. supraspinatus* occupying the area at the cranio-lateral base of the scapula and the caudodorsal half of the procoracoid, where the ancestral *supraspinatus* attached (Gregory & Camp, 1918; Romer, 1922; Jenkins, 1971a). On the other hand, Kemp (1980a, 1980b) considered the “infraspinous fossa” an attachment site for *m. deltoideus scapularis* and *m. teres minor*. Under this hypothesis, the ventral procoracoid area attributed to *m. supraspinatus* by others would instead be occupied by an undifferentiated *m. supracoracoideus*. This latter interpretation more closely resembles the monotreme condition, wherein *m. supraspinatus* and *m. infraspinatus* are located at the cranial base of the scapula and on the procoracoid (Howell, 1937a; Gambaryan et al. 2015). However, despite their more stem-ward position in the mammal phylogeny, the suitability of extant monotremes as cynodont analogues may be compromised by modifications for a fossorial or aquatic lifestyle (Howell, 1937b; Jenkins, 1971a; Kemp, 1980b). The probable cranial migration of *m. deltoideus scapularis* in cynodonts (see above) likely corresponded to a dorsal expansion of *m. supracoracoideus* along the large, laterally-facing surface of the scapula, paralleling its origin from the lateral scapular base and procoracoid of lepidosaurs and archosaurs (Table 2).

Kemp (1980a) further argued that *m. supraspinatus* preceded *m. infraspinatus* in differentiating from *m. supracoracoideus*, via dorsal migration onto the anteriorly-facing surface of the reflected cranial scapular border. The ventral border of the clavicle is closely juxtaposed with the dorsal border of the procoracoid in the neutrally-posed pectoral girdle of *Massetognathus* (Fig. 3), leaving little space in between to accommodate such a muscle or its tendon, which in any case would have had to wrap around the acromion to reach Kemp’s proposed insertion on the greater tubercle of the humerus. The anteriorly-facing surface of the reflected cranial border was more likely occupied by various extrinsic muscles inserting on the scapula, such as *m. trapezius* and *m. levator scapulae*, both of which are likely plesiomorphic for amniotes (Diogo et al. 2009; Jouffroy et al. 1971).

We follow Romer (1922), Gregory and Camp (1918), and Jenkins (1971a) in reconstructing *m. infraspinatus* on most of the lateral surface of the scapula, caudal to the origin of *m. deltoideus scapularis* (Fig. 7). This muscle has a tendinous insertion on a rugosity on the distal portion of the greater tubercle, between the insertion of *m. supraspinatus* and the proximalmost margin of the humeral deltopectoral crest (Fig. 4). This position is intermediate between the insertion of *m. supracoracoideus* in *Varanus* (Jenkins & Goslow, 1983) on the proximal border of the deltopectoral crest, and the insertion of *m. spinati* in mammals on the greater tubercle proper (Leach, 1977; Warburton et al. 2014; Jenkins & Weijs, 1979). An *m. supracoracoideus/m. supraspinatus* was likely present in *Massetognathus*, originating on the rugose area around the cranial scapular base and the adjoining procoracoid (Fig. 7). The presumptive *m. supraspinatus* inserts by a tendon on a rugosity on the proximal half of the humeral greater tubercle, just proximal to the insertion of *m. infraspinatus* (Fig. 4).

**M. teres minor (Figs. 4, 7)**  
According to Diogo et al. (2009), the origins of the mammalian *m. teres minor* are murky, with workers proposing homology with either *m. scapulohumeralis anterior* based on development (Romer, 1944; Cheng, 1955), or *m. deltoideus scapularis* based on the co-existence of *m. teres minor* with *m. scapulohumeralis anterior* in extant monotremes (Howell, 1937a; Jouffroy et al. 1971). Presuming homology with *m. scapulohumeralis anterior*, Romer (1922) reconstructed the origin of *m. teres minor* in cynodonts at the caudolateral base of the scapula, just cranial to the origin of *m. triceps brachii*. Gregory and Camp (1918) and Jenkins (1971a) also placed *m. teres minor* at the caudolateral base of the scapula, but ventral to the origin of *m. triceps brachii* rather than adjacent to it. Following the deltoid origin hypothesis for *m. teres minor*, Kemp (1980b) favored an origin high up near the vertebral border on the lateral surface of the scapula, recalling this muscle’s location in monotremes (Howell, 1937a; Gambaryan, 2015). *Massetognathus* presents no clear area of origin for *m. teres minor* on the dorsolateral surface of the scapula, but does possess a scar at the base of the lateral scapular surface (Fig. 7). We therefore agree with Gregory and Camp (1918) and Romer (1922) that this was the likely site of origin for *m. teres minor*. It is worth noting that this location is compatible with both hypotheses of origin, via either ventral differentiation of the deltoid complex or direct homology with *m. scapulohumeralis anterior*. In mammals, *m. teres minor* inserts via a tendon on the greater tubercle of the humerus (Howell, 1937a; Gambaryan et al. 2015; Jenkins & Weijs 1979; Stein, 1981; Leach, 1977). In extant lepidosaurs, *m. scapulohumeralis*

392 anterior inserts on the dorsal surface of the humerus near the insertions of m. deltoideus and m.  
393 latissimus dorsi (Romer, 1922; Miner, 1925; Holmes, 1977; Jenkins & Goslow, 1983). We follow Jenkins  
394 (1971a) and Kemp (1980b) in placing the insertion of m. teres minor on a short ridge extending parallel to  
395 the long axis of the humerus from the junction of the deltopectoral crest and the greater tubercle (Fig. 4).

396  
397 **M. subcoracoscapularis/subscapularis (Figs. 4, 7)**

398 All tetrapods possess either m. subcoracoscapularis or m. subscapularis in the form of a muscle  
399 originating over much of the medial surface of the scapulocoracoid or scapula (Table 2). In lepidosaurs  
400 and monotremes, this muscle has an additional head originating on the medial surfaces of the coracoid  
401 and the procoracoid (Jenkins, 1971a; Jenkins & Goslow, 1983; Gambaryan et al. 2015). Regardless of  
402 origin, m. subcoracoscapularis/subscapularis always inserts via a tendon in the vicinity of the humeral  
403 lesser tubercle (Table 2). M. subcoracoscapularis is found on the medial side of the scapulocoracoid in all  
404 cases except for monotremes, where the subscapular fossa has migrated around the caudal border of the  
405 scapula to face posterolaterally, exposing the subscapularis in lateral view. The cynodont scapula exhibits  
406 no such torsion, and the presumptive fossa for m. subcoracoscapularis faces primarily medially, as is the  
407 case for all other tetrapods. We follow Gregory and Camp (1918), Jenkins (1971a) and Kemp (1980a) in  
408 reconstructing a two-headed subcoracoscapularis originating on the medial surfaces of the scapula and  
409 coracoid (Fig. 7), and inserting via a tendon on a rugose area at the apex of the lesser tubercle on the  
410 humerus (Fig. 4).

411  
412 **M. teres major (Figs. 4, 7)**

413 M. teres major (Table 2) is present in crocodylians (Meers, 2003) and all mammals (Howell, 1937a;  
414 Gambaryan et al. 2015; Jenkins & Weijs, 1979; Stein, 1981, 1986; Leach, 1977; George, 1977; Abdala &  
415 Diogo, 2010), but is absent in lepidosaurs (Romer, 1944; Diogo et al. 2009; Abdala & Diogo, 2010).  
416 Abdala and Diogo (2010) considered m. teres major a derivative of m. subcoracoscapularis, homologous  
417 across crocodylians and mammals, and secondarily lost in lepidosaurs and bird-line archosaurs. In  
418 therians and crocodylians, the origin of m. teres major runs dorsoventrally along the axillary border of the  
419 scapula from the caudal angle (Fig. 7), or on the lateral surface of the scapula adjacent to the axillary  
420 border (Meers, 2003; Howell, 1937a; Gambaryan et al. 2015; Jenkins & Weijs, 1979; Stein, 1981; Leach,  
421 1977; George, 1977; Abdala & Diogo, 2010; Harvey & Warburton, 2010; Taylor, 1978). In monotremes,  
422 the origin of m. teres major runs craniocaudally along the lateral surface of the scapula, terminating at the  
423 caudal angle. Depending on whether the crocodylian m. teres major is homologous to that of mammals,  
424 m. teres major is either a level I or a level II inference. In certain cynodonts, such as *Cynognathus*, part of  
425 the axillary border of the scapula is reflected laterally into a ridge dividing the caudalmost part of the  
426 lateral scapular surface from the infraspinous fossa (Romer, 1922; Jenkins, 1971a; Liu, 2007). Some  
427 workers have interpreted this clearly demarcated fossa as the origin of m. teres major (Gregory & Camp,  
428 1918; Jenkins, 1971a). In other cynodonts, including cynognathians such as *Luangwa* (Kemp, 1980b) and  
429 *Massetognathus*, this caudal fossa is absent, although the scapula does have a somewhat thickened  
430 area on the laterally-reflected axillary border (Fig. 7). We follow Kemp (1980b) in reconstructing m. teres  
431 major as a straplike muscle originating as a narrow strip along this thickened dorsal region of the  
432 scapula's axillary border (Fig. 7). M. teres major likely inserted along a ridge running proximodistally along  
433 the dorsal surface of the humeral diaphysis (Fig. 4), parallel to the insertion of m. latissimus dorsi but  
434 slightly proximal (Jenkins, 1971a).

435  
436 **M. coracobrachialis (Figs. 4, 7)**

437 M. coracobrachialis (Table 2) is present in all extant tetrapods as a muscle running from the posterior part  
438 of the lateral coracoid surface—with a second head at the cranio-lateral base of the scapula in  
439 crocodylians (Meers, 2003)—to an insertion on the ventromedial surface of the humerus, extending onto  
440 the posteromedial surface of the humeral deltopectoral crest (Walthall & Ashley-Ross, 2006; Meers,  
441 2003; Diogo et al. 2009; Abdala & Diogo, 2010; Holmes, 1977; Miner, 1925; Howell, 1937a; Gambaryan  
442 et al. 2015). While the presence of m. coracobrachialis as a whole is conserved among tetrapods, its  
443 subdivisions and by extension its distal attachments are not. This muscle exists as longus, medius, and  
444 brevis divisions in most amphibians (but not all, see Walthall & Ashley-Ross, 2006 and Abdala & Diogo,  
445 2010). Lepidosaurs have lost the medius division (Abdala & Diogo, 2010, Jenkins & Goslow, 1983);  
446 crocodylians have lost all but the brevis division (Meers, 2003); monotremes seem to have lost either the  
447 brevis division (Diogo et al. 2009) or the medius (Gambaryan et al. 2015); while therians lose the longus



448 and sometimes also the brevis (Diogo et al. 2009; Leach, 1977; George, 1977; Harvey & Warburton,  
449 2010). While the homology of the various m. coracobrachialis divisions among extant tetrapods is beyond  
450 the scope of this paper, it seems safe to say that non-mammalian cynodonts probably had some form of  
451 m. coracobrachialis. Here we have reconstructed two origins and two insertions, representing possible  
452 brevis/medius and longus divisions.  
453

454 Romer (1922) and Jenkins (1971a) considered the cynodont m. coracobrachialis to originate just caudal  
455 to m. biceps brachii within a fossa on the lateral surface of the coracoid, while Gregory and Camp (1918)  
456 assigned that fossa to m. biceps brachii and placed m. coracobrachialis on the caudal tip of the coracoid  
457 instead. *Massetognathus* has a well-marked fossa on the coracoid immediately cranial and inferior to the  
458 glenoid, and a smaller, shallower scar on the procoracoid immediately cranial to the procoracoid-coracoid  
459 suture (Fig. 7). It seems likely that m. coracobrachialis originated on the former and m. biceps brachii on  
460 the latter, echoing the arrangement of these muscles in extant *Iguana* (Romer, 1922) and *Alligator*  
461 (Meers, 2003). A second m. coracobrachialis head may have originated on the lateral surface of the  
462 coracoid, caudal and inferior to the glenoid (Fig. 7). There is no rugosity associated with m.  
463 coracobrachialis medius on the humerus of *Massetognathus*, but insertion can reasonably be assumed to  
464 have occurred on the large fossa on the ventromedial surface, with a possible insertion for m.  
465 coracobrachialis longus occurring further distal on a ridge near the entepicondyle (Fig. 4), consistent with  
466 past reconstructions (Watson, 1917; Gregory & Camp, 1918; Romer, 1922; Miner, 1925).  
467

#### 468 **M. biceps brachii (Figs. 7, 8)**

469 M. biceps brachii is likely an amniote synapomorphy, derived from m. coracobrachialis (Abdala & Diogo,  
470 2010). The two heads of this muscle generally originate on adjacent areas of the lateral coracoid (Miner,  
471 1925; Romer, 1922; Jenkins, 1971a; Howell, 1937a; Holmes, 1977), although m. biceps brachii brevis is  
472 usually absent in *Alligator* (Meers, 2003), and the origin of m. biceps brachii brevis is shifted caudally to  
473 the tip of the coracoid in *Ornithorhynchus*, similar to the condition seen in *Tupaia* (George, 1977) and  
474 *Homo* (Netter et al. 1989). We follow Romer (1922) and Jenkins (1971a) in reconstructing an origin for m.  
475 biceps brachii in a depression on the lateral surface of the procoracoid, cranial to the procoracoid-  
476 coracoid suture and inferior to the procoracoid foramen (Fig. 7). A second head (m. biceps brachii brevis)  
477 may have originated on a scar on the lateral surface of the coracoid tip (Kemp, 1980b). M. biceps brachii  
478 inserts via a tendon on or near the radial tuberosity of the radius in all tetrapods (Table 2), and is  
479 reconstructed similarly in *Massetognathus* (Fig. 4).  
480

#### 481 **M. triceps brachii (Figs. 4, 7, 8)**

482 M. triceps brachii is present in all tetrapods (Table 2). Despite the name, triceps divisions vary in number  
483 from four in urodeles, lepidosaurs, and mammals (if m. dorsoepitrochlearis is an m. triceps derivative) to  
484 five in crocodylians (Diogo et al. 2009; Abdala & Diogo, 2010). Holmes (1977) and Abdala and Diogo  
485 (2010) considered a complement of four comprising a coracoid head, a scapular head, and two humeral  
486 heads to be plesiomorphic for amniotes. In extant *Iguana*, m. triceps brachii coracoideus originates from a  
487 scar on the medial side of the coracoid, close to its caudal tip, while m. triceps brachii scapularis takes  
488 origin on a scar near the caudal base of the scapula (Romer, 1922). In extant monotremes, m. triceps  
489 coracoideus is absent whereas m. triceps brachii scapularis originates along a ridge dividing the  
490 infraspinous fossa from the subscapular fossa, a feature likely homologous with the axillary border of the  
491 scapula in other tetrapods given the relocation of m. subscapularis from the medial surface of the scapula  
492 to the posterolateral border (Gambaryan et al. 2015). *Massetognathus* has a scar on the caudomedial  
493 surface of the scapula just superior to the supraglenoid buttress, and another on the medial edge of the  
494 caudal tip of the coracoid. We follow Jenkins (1971a) in reconstructing an m. triceps brachii scapularis on  
495 the former, and a possible m. triceps brachii coracoideus on the latter (Fig. 7). There is reason to be  
496 skeptical about the presence of m. triceps brachii coracoideus in cynodonts: Romer (1922) also favored  
497 the supraglenoid scar as the origin of the scapular head of m. triceps brachii, but considered the coracoid  
498 head to have been lost, while Kemp (1980a) reasoned that a coracoid head for m. triceps brachialis is  
499 incompatible with an extended, horizontal humerus, and placed m. biceps brachii at the tip of the coracoid  
500 instead. There are no unambiguous sites of origin for the two humeral heads of m. triceps brachii on the  
501 humerus of *Massetognathus*, but these are likely to have originated somewhere along the medial and  
502 lateral surfaces of the humeral diaphysis as in the case of all tetrapods possessing them (Table 2), distal

503 to the insertions of m. teres major and m. teres minor (Romer, 1922). All divisions of m. triceps brachii  
504 insert via a common tendon on the olecranon process of the ulna (Fig. 8).

## 505 506 **DISCUSSION**

507 The present study integrates evidence from an extant phylogenetic bracket with direct observation of  
508 bony features, and corroborates earlier work (Jenkins, 1971a; Gregory & Camp, 1918) in recovering a  
509 near-therian complement of shoulder-actuating muscles in cynodonts. All but five muscles were  
510 reconstructed in *Massetognathus pascuali* as strong level I inferences, with the exceptions being m.  
511 pectoralis minor, m. deltoideus acromialis, m. teres minor, m. supraspinatus, and m. teres major. The  
512 former three are level II inferences, while the latter two are either level I or level II, depending on  
513 homology. Of these five muscles, we opted to reconstruct those whose attachments indicate distinct  
514 actions on motions of the forelimb at the shoulder (m. teres minor, m. supraspinatus, m. teres major), and  
515 omit those with similar actions at the shoulder to muscles already reconstructed as definitely present (m.  
516 pectoralis minor≈m. pectoralis major; m. deltoideus acromialis≈m. deltoideus scapularis). Our  
517 reconstructed attachment areas encompass both the excluded potential muscles and their larger  
518 neighbors, so that these muscles may be considered together as functional groups in future  
519 biomechanical analyses. Studies of extant amniotes have shown that osteological correlates to muscle  
520 attachments differ between mammalian and non-mammalian taxa (Holmes, 1977; McGowan, 1986),  
521 being more likely to manifest as rugosities in the former, versus depressions and processes in the latter  
522 (Bryant & Seymour, 1990). *Massetognathus* exhibits a combination of well-marked depressions (e.g. m.  
523 biceps brachii and m. coracobrachialis origins) and rugosities (e.g. rotator cuff and m. latissimus dorsi  
524 insertions), while distinct processes seem to be rare (coracoid origin of m. triceps brachii, if present). A  
525 mix of mammal-like and non-mammal-like muscle scars is consistent with the intermediate phylogenetic  
526 position of non-mammalian cynodonts. Notably, several of the muscles reconstructed (namely, m.  
527 pectoralis, m. deltoideus, m. latissimus dorsi, m. teres major, and m. teres minor) have long, narrow  
528 insertions extending proximodistally along the humeral diaphysis, raising the question of whether  
529 resistance to torsion in long, flat muscles might present constraints on humeral movement.

## 530 531 **Comparison with previous range of motion measurements**

532 The mobility of individual joints has not been extensively documented for the cynodont forelimb, and most  
533 workers have focused on the gleno-humeral joint over more proximal or distal articulations. Jenkins  
534 (1971a) reported 30° of long-axis rotation and 40° of adduction at the gleno-humeral joint, while Kemp  
535 (1980a, 1980b) reported 90° of long-axis rotation, nearly 90° of protraction-retraction (“from almost  
536 transverse to fairly close to posteriorly directed”), and a “reasonable degree” of abduction-adduction at  
537 the same joint. Both Jenkins’ and Kemp’s numbers fall close to the limits reported here, with the  
538 exception of Kemp’s long-axis rotation measurement, which exceeds ours by 20°. The discrepancy  
539 between Jenkins’ and Kemp’s measurements may be phylogenetic, but may also reflect differing  
540 assumptions of joint kinematics. While both workers hypothesized a translational component of humeral  
541 motion, Jenkins’ values resemble our rotation-only measurements, while Kemp’s estimates are closer to  
542 our combined translation-rotation measurements (Table 1). Oliveira and Schultz (2016) measured 70° of  
543 abduction-adduction, 15-20° of retraction-protraction, and an unspecified amount of long-axis rotation at  
544 the gleno-humeral joint. Their measurements fall within our maximum ranges, although they do not report  
545 their joint space assumptions and coordinate systems.

546  
547 Kemp (1980b) reported over 90° of flexion-extension for the radius and ulna at their respective  
548 articulations with the humerus. Oliveira and Schultz (2016) considered the radius and ulna as a functional  
549 unit, measuring over 100° of flexion-extension at the elbow. Oliveira and Schultz additionally reported 25°  
550 of mediolateral rotation at the clavo-interclavicular joint, and 15° of roll, 25° of yaw, and 30° of pitch at the  
551 acromio-clavicular joint. Again, these values all fall well within our measured ranges (Table 1).

552  
553 It should be stressed that the angular ranges reported in Table 1 represent maximum estimates of joint  
554 mobility. It is well established that extrinsic soft tissues such as ligaments, joint capsules, labra, muscles,  
555 and integument restrict range of motion in an intact animal to a subset of the mobility assessed from  
556 manipulation of dry bones (Pierce et al. 2012; Arnold et al. 2014; Hutson & Hutson, 2012, 2014); although  
557 the shoulder appears to be less constrained than the hip, and long-axis rotation seems to be the most  
558 affected (Pierce et al. 2012). The aim of this analysis was to establish reasonable maximum ranges as a

559 basis for future validation and refinement, and we fully expect the maximum range of motion at all joints  
560 modeled here to decrease substantially with the imposition of soft tissue constraints. Radiographic  
561 studies of *in vivo* joint utilization (e.g. Fischer, 1994; Kambic et al. 2014) suggest that an even smaller  
562 fraction of that mobility is actually employed during normal locomotion, with the remaining available joint  
563 surface reserved for non-locomotor behaviors.

### 564 565 **Comparison with previous muscle reconstructions**

566 Using mammalian muscle anatomy as reference, Oliveira and Schultz (2016) reconstructed the pectoral  
567 girdle and forelimb musculature of *Trucidocynodon riograndensis*, a Brazilian Triassic eucynodont. The  
568 present reconstruction agrees with theirs in the location of the scapular and humeral heads of m. triceps  
569 brachii, and differs in the relative arrangement of m. latissimus dorsi and m. teres major insertions (m.  
570 latissimus dorsi inserts distal and medial to m. teres major in our reconstruction, whereas m. latissimus  
571 dorsi is proximal and lateral in Oliveira and Schultz, 2016), and the presence of a humeral origin for m.  
572 biceps brachii (absent in ours, present in theirs). We attribute these discrepancies to our use of extant  
573 phylogenetic bracketing for determining muscle attachments, in contrast to their adherence to mammalian  
574 anatomy. Unlike Oliveira and Schultz, we stopped short of recreating the morphology of the muscles  
575 themselves. While Lautenschlager (2013) and others (Holliday, 2009; Cuff & Rayfield, 2015) have shown  
576 the feasibility of using topography and spatial exclusion to establish the morphology of tightly juxtaposed  
577 cranial muscles with direct attachments, limb muscles tend to be more widely spaced, and Bryant and  
578 Seymour (1990) caution that architecture and non-uniform cross-sections can confound three-  
579 dimensional reconstructions of muscles with tendinous attachments.

580  
581 While Gregory and Camp (1918) recovered a similar muscle reconstruction to ours for the cynodont  
582 *Cynognathus*, their skeletal reconstruction differed in one important respect. *Cynognathus* was  
583 reconstructed with the scapulocoracoids much closer to the animal's sagittal plane, such that the  
584 coracoids appear to contact the interclavicle along the ventral midline. This arrangement resembles that  
585 seen in extant monotremes, wherein the coracoids articulate with the interclavicle and the procoracoids  
586 are closely apposed, occasionally overlapping asymmetrically (Cave, 1970). This has been suggested to  
587 be a derived condition allowing better resistance to compressive forces, and possibly related to fossorial  
588 or swimming behaviors (Luo, 2015). In *Massetognathus*, the length and curvature of the clavicles  
589 necessitate substantial separation between the scapulocoracoids, regardless of clavicular mobility. The  
590 lateral separation between the scapulocoracoids and the interclavicle tends to get understated in two-  
591 dimensional reconstructions, many of which depict a lateral view showing only the smaller vertical  
592 component of the gap (e.g. Jenkins, 1971a; Kemp, 1980a, 1980b; Sun & Li, 1985).

593  
594 Gregory and Camp (1918) noted that the suprascapular cartilages in their reconstruction are probably too  
595 small, as the dorsalmost extent of these structures is still far ventral to the tops of the neural spines in the  
596 vertebral column, possibly compromising the ability of m. rhomboideus and m. trapezius to suspend the  
597 thorax. Greater separation between the scapulocoracoids would ameliorate this by placing the scapulae  
598 higher up on the animal's body wall. Curiously, Gregory and Camp go on to hypothesize a thin  
599 epicoracoid element in the Permian therapsid *Moschops*, spanning the gap between the clavicles,  
600 procoracoids, and the interclavicle. It is unclear why they did not propose a similar structure in  
601 *Cynognathus*, but the irregular ventromedial margins of the procoracoid and coracoid (Fig. 7) in  
602 *Massetognathus* are consistent with having possibly articulated with unossified epicoracoid cartilages in  
603 life, as seen in extant lepidosaurs (Fürbringer, 1900). The wide separation between the scapulocoracoids  
604 and the midventral interclavicle in *Massetognathus* is suggestive of a functional transformation away from  
605 the massive, heavily ossified, "U"-shaped girdles seen at the base of the synapsid tree, possibly reflecting  
606 a shift in the loading regime experienced by the forelimb and pectoral girdle from mediolateral  
607 compression towards more vertically-oriented reaction forces (Jenkins, 1971a). Continued reduction of  
608 the endochondral primary girdle (scapulocoracoid) and dermal secondary girdle (clavicle, interclavicle)  
609 throughout cynodont evolution may have resulted in progressively greater separation between the  
610 scapulocoracoids, presaging the fully independent therian pectoral girdle, dominated by a large scapula  
611 and a reduced, strutlike clavicle (Jenkins & Weijs, 1979; Luo, 2015).

### 612 613 **Mobility of the pectoral girdle**

614 Kemp (1980b) hypothesized that some degree of mobility in the cynodont pectoral girdle would have  
615 been necessary in order to increase the functional length of the forelimb to match that of the hindlimb.  
616 Hopson (2015) also considered the issue of stride length in his analysis of the pelycosaur *Dimetrodon*,  
617 attributing it to mediolateral rotation of the pectoral girdle from increased bending of the trunk. Lateral  
618 bending was suggested to have been lost or greatly reduced in therapsids (Jenkins, 1971a; Kemp, 2005),  
619 and it seems unlikely that the cynodont pectoral girdle could have rotated as a single unit with respect to  
620 the axial skeleton. It is worth noting that multiple derived amniote lineages seem to have converged on  
621 some degree of pectoral girdle mobility—substantial translational coracosternal mobility has been  
622 reported in several extant non-mammals, including lepidosaurs (Peterson, 1973; Jenkins & Goslow,  
623 1983), ornithomirans (Baier et al. 2013), and pseudosuchians (Baier & Gatesy, 2013). Little is yet known  
624 about the soft-tissue constraints acting on the joints of the non-mammalian synapsid pectoral girdle.  
625 Based on osteology, there is no *a priori* reason to reject the possibility that rotation at the clavo-  
626 interclavicular and acromio-clavicular joints may have furnished a degree of independent scapulocoracoid  
627 mobility in *Massetognathus*. Experimenting with hypothetical, non-physiological poses reveals that  
628 scapulocoracoid mobility allows a significant increase in maximum forelimb excursion, as well as slightly  
629 more medial placement of the wrist (Fig. 9). Among derived probainognathian cynodonts, tritylodonts  
630 (though not tritheledonts), basal mammaliaforms, and monotremes exhibit expanded lateral processes on  
631 their interclavicles that overlap substantially with the proximal ends of their clavicles, precluding clavo-  
632 interclavicular mobility (Luo, 2015; Jenkins & Parrington, 1976). The ability to unilaterally move one side  
633 of the pectoral girdle may have helped functionally separate limb pairs, possibly laying the groundwork for  
634 the evolution of asymmetrical gaits. However, if clavo-interclavicular mobility was indeed present in more  
635 stem-ward cynodonts, the robust, immobile pectoral girdle of monotremes would then represent an  
636 interesting atavistic reversal (Ji et al. 1999).

637

### 638 **Epiphyses and range of motion**

639 Among amniotes, ossified epiphyses with well-defined articular surfaces arose convergently in mammals  
640 and lepidosaurs (Haines, 1969); unossified epiphyses lacking growth plates are plesiomorphic for  
641 cynodonts (Luo et al. 2007b), and the articular surfaces of long bones are thought to have been extended  
642 and elaborated by cartilaginous structures in life (Jenkins, 1971a; Jenkins & Parrington, 1976).  
643 Progressive removal of connective tissues in archosaurs has shown that cartilage may increase the range  
644 of motion available at a joint (Hutson & Hutson, 2012), and that the surface morphology of cartilage caps  
645 may differ sufficiently from that of the underlying bone to meaningfully alter joint action (Holliday et al.  
646 2010). While it is unclear how cynodont cartilage caps compared to those of either extant crocodylians or  
647 extant avians in thickness, both Jenkins and Kemp mentioned them in their reconstructions of cynodont  
648 limb function. Jenkins (1971) noted the discrepancy in curvature between the “notch-shaped” hemisellar  
649 glenoid and the convex, ovoid humeral head, and posited that a substantial thickness of cartilage must  
650 have been present in life to increase congruence between the articular surfaces, much like in extant  
651 archosaurs (Holliday et al. 2010). Kemp (1980b), on the other hand, argued that any cartilaginous  
652 intermediary would have had to be “absurdly thick” to match the humeral head’s curvature to that of the  
653 glenoid fossa, and interpreted the incongruity in articular morphology as representing a “rolling” rather  
654 than sliding articulation at the gleno-humeral joint.

655

656 The 0.25 mm of epiphyseal cartilage modeled here (both proximal and distal) is based on mammalian  
657 measurements from the literature. An articular cap measuring 0.25 mm on each epiphysis adds up to 0.5  
658 mm per long bone, and represents an approximate 1% contribution to humeral length in *Massetognathus*.  
659 This is comparable with measurements taken by Holliday et al. (2010) from extant avians (0.07%-3.72%),  
660 but falls below the 7.99% measured in *Alligator*. However, it is unclear whether archosaurs, and *Alligator*  
661 in particular, represent good models for reconstructing non-mammalian synapsids. We were unable to  
662 locate cartilage measurements for lepidosaurs or amphibians in the literature, but epiphyseal cartilage is  
663 likely to be thin in the former clade given the presence of extensive secondary ossification centers  
664 (Haines, 1969), and extensive in the latter due to their aquatic tendencies.

665

666 Greater cartilage thickness—and consequently greater joint space—may indeed further increase range of  
667 motion. An informal sensitivity test on this model revealed that a threefold increase in joint space (from  
668 0.50 mm to 1.50 mm) increased rotation-only range of motion to ranges comparable to combined  
669 translation-rotation levels measured with the original 0.50 mm joint space. However, thicker cartilage may



670 significantly alter functional articular morphology from that of the underlying bone (Holliday et al. 2010).  
671 Since the superficial cartilage morphology is unpreserved, we are unable to satisfactorily bound this into a  
672 testable problem, and instead present measurements based on a joint space of 0.5 mm (Table 1) a  
673 conservative estimate.

#### 674 675 **Evolution toward the therian glenoid fossa**

676 The separate scapular and coracoid facets that together comprise the glenoid fossa deserve closer  
677 examination. The basal cynodont glenoid is commonly described as laterally or posterolaterally-facing  
678 and either “hemisellar” (Jenkins, 1971a) or “notch”-shaped (Kemp, 2005), a morphology retained through  
679 progressively more derived eucynodonts and mammaliaforms before finally evolving into the familiar,  
680 ventrally-directed, mammalian ball-and-socket joint in the Jurassic theriomorphs (Luo, 2015). In  
681 *Massetognathus*, the scapular and coracoid facets of the glenoid are dissimilar in morphology (Fig. 10).  
682 Viewed together, the two create the impression of a unified notch, but close examination reveals that the  
683 coracoid facet is mediolaterally convex, with a small, laterally projecting lip at its ventral apex creating a  
684 small degree of dorsoventral concavity. The scapular facet is set at an obtuse angle (approx. 130°) to the  
685 coracoid facet, and is slightly concave at the center (*contra* Jenkins, 1970b, where it is described as  
686 slightly convex in the same specimen). A procoracoid contribution to the glenoid seems somewhat  
687 variable among cynognathians; it is completely excluded from the glenoid in *Massetognathus*, but makes  
688 up a small, cranial portion of the articulation in *Cynognathus* (Jenkins, 1971a).

689  
690 Jenkins (1971a) interpreted the separate scapular and coracoid facets as representing a functional  
691 division within the glenoid, with a possibly ventrally-facing scapular facet serving to transmit the vertical  
692 component of ground reaction force during locomotion. The full-girdle reconstruction of *Massetognathus*  
693 presented here confirms a ventral orientation for the scapular facet (Fig. 3). Taking Jenkins’ logic a step  
694 further, one could hypothesize that the laterally-facing coracoid and procoracoid may have initially  
695 functioned to accommodate a substantial lateral component of ground reaction force. Increasingly  
696 parasagittal limb kinematics and increasingly vertically-oriented ground reaction forces in more crown-  
697 ward taxa might have accompanied progressively reduced coracoid and procoracoid contributions to the  
698 glenoid, until all that remained was a broadened, deepened scapular facet forming a ventrally-facing,  
699 socket-shaped glenoid. Under this scenario, the characteristic therian ball-and-socket joint was achieved  
700 not through reorientation of an ancestrally laterally-facing composite glenoid as a whole, but rather  
701 progressive reduction, ventral reorientation, and possibly partial assimilation (Vickaryous & Hall, 2006) of  
702 the plesiomorphic coracoid facet into a pre-existing, ventrally-facing, concave scapular facet. This  
703 hypothesis of glenoid transformation is wholly compatible with macroevolutionary trends in coracoid  
704 reduction and scapular expansion among derived cynodonts, as reported by Luo (2015) as well as  
705 Jenkins and Weijs (1979).

#### 706 707 **Differences between monotreme and cynodont pectoral girdles**

708 As the sister group to crown therians, extant monotremes have long been used as models for  
709 understanding non-mammalian cynodont biology (Gregory & Camp, 1918; Kemp, 1980a; Luo, 2007). In  
710 addition to the foregoing discrepancy in scapulocoracoid position, our reconstruction of *Massetognathus*  
711 differs from monotremes in a number of important musculoskeletal respects, namely the length of the  
712 clavicles and the extent of their overlap with the interclavicle; the significant mediolateral torsion present  
713 in the monotreme scapula but absent in *Massetognathus*; the higher aspect ratio and weaker long-axis  
714 torsion of the humerus in *Massetognathus*; the insertion of *m. latissimus dorsi* (much more distal in  
715 monotremes); the origin of *m. teres minor* (far dorsal in monotremes); and the orientation of the fossa for  
716 *m. subcoracoscapularis* (medially-facing in *Massetognathus* and all other amniotes, posterolaterally-  
717 facing in monotremes). In reconstructing *Massetognathus*, we found that monotreme muscle attachments  
718 were frequently the exception in the extant phylogenetic bracket, with the monotreme *m.*  
719 *subcoracoscapularis* in particular differing from its location and attachments in therians and saurians  
720 alike. These discrepancies raise the question of whether ecological specializations may have left a  
721 confounding signature on the musculoskeletal organization of the monotreme pectoral girdle and forelimb.  
722 It seems reasonable to entertain the possibility that niche adaptation and low ecological diversity in extant  
723 monotremes may render them compromised locomotor analogues for non-mammalian cynodonts  
724 (Howell, 1936; Jenkins, 1971a; Jenkins, 1989). If this is the case, it may be prudent to situate

725 interpretations of postcranial function in non-mammalian cynodonts within a wide, comparative context  
726 spanning mammalian and non-mammalian forms.

727

## 728 **CONCLUSION**

729 The musculoskeletal reconstruction of *Massetognathus pascuali* presented here recovers maximum  
730 ranges of motion and muscle origins and insertions comparable to those found in previous studies, and  
731 reveals features of the pectoral girdle not previously described for this genus, such as a wide separation  
732 between the scapulocoracoids and the interclavicle, possible mobility at the clavo-interclavicular and  
733 acromio-clavicular joints, and a ventrally-facing, concave scapular facet of the glenoid fossa. Extensive  
734 functional interpretation of our 3D reconstruction awaits further comparison with extant mammalian and  
735 non-mammalian taxa. Having already mapped well-defined muscle attachment areas onto a digital  
736 skeleton, we have laid the groundwork for constructing interactive musculoskeletal models. Future  
737 experiments that combine detailed musculoskeletal modeling with *ex vivo* and *in vivo* data from extant  
738 taxa will provide the opportunity to investigate the relationship between skeletal posture and muscle  
739 function, and shed further light on the cynodont pectoral limb and its significance to the rise of mammals.

740

## 741 **ACKNOWLEDGEMENTS**

742 We thank Katrina Jones for her help with CT scanning, and Jessica Cundiff for assistance with specimens  
743 in the MCZ. The Pierce and Biewener labs provided valuable feedback. Financial support was provided  
744 by Harvard University funds made available to S.E.P. CT data is reposted in the Department of  
745 Vertebrate Paleontology, Museum of Comparative Zoology, Harvard University. The authors declare no  
746 conflicts of interest.

747

## 748 **AUTHOR CONTRIBUTIONS**

749 All authors contributed to study conception and manuscript preparation. P.H.L. and S.E.P. contributed to  
750 experimental design, data acquisition, and interpretation. All authors gave final approval for publication.

751

## 752 **REFERENCES**

753 Abdala, V., & Diogo, R. (2010). Comparative anatomy, homologies and evolution of the pectoral and  
754 forelimb musculature of tetrapods with special attention to extant limbed amphibians and reptiles. *Journal*  
755 *of Anatomy*, 217(5), 536–573.

756

757 Arnold, P., Fischer, M. S., & Nyakatura, J. A. (2014). Soft tissue influence on *ex vivo* mobility in the hip of  
758 Iguana: comparison with *in vivo* movement and its bearing on joint motion of fossil sprawling tetrapods.  
759 *Journal of Anatomy*, 225(1), 31–41.

760

761 Baier, D. B., Gatesy, S. M., & Dial, K. P. (2013). Three-dimensional, high-resolution skeletal kinematics of  
762 the avian wing and shoulder during ascending flapping flight and uphill flap-running. *PloS One*, 8(5),  
763 e63982.

764

765 Baier, D. B., & Gatesy, S. M. (2013). Three-dimensional skeletal kinematics of the shoulder girdle and  
766 forelimb in walking Alligator. *Journal of Anatomy*, 223(5), 462–473.

767

768 Bates, K. T., & Schachner, E. R. (2012). Disparity and convergence in bipedal archosaur locomotion.  
769 *Journal of the Royal Society, Interface / the Royal Society*, 9(71), 1339–1353.

770

771 Brainerd, E. L., Baier, D. B., Gatesy, S. M., Hedrick, T. L., Metzger, K. A., Gilbert, S. L., & Crisco, J. J.  
772 (2010). X-ray reconstruction of moving morphology (XROMM): precision, accuracy and applications in  
773 comparative biomechanics research. *Journal of Experimental Zoology. Part A, Ecological Genetics and*  
774 *Physiology*, 313(5), 262–279.

775

776 Bryant, H. N., & Seymour, K. L. (1990). Observations and comments on the reliability of muscle  
777 reconstruction in fossil vertebrates. *Journal of Morphology*, 206(1), 109–117.

778

779 Cave, A. J. E. (1970). Observations on the monotreme interclavicle. *Journal of Zoology*, 160(3), 297–312.

780

- 781 Cheng, C.-C. (1955). The development of the shoulder region of the opossum, *Didelphys virginiana*, with  
782 special reference to the musculature. *Journal of Morphology*, 97(3), 415–471.  
783
- 784 Coues, E. (1871). *On the Myology of the Ornithorhynchus*.  
785
- 786 Coues, E. & Wyman, J. (1872). *The osteology and myology of Didelphys virginiana* (p. 116). Boston :The  
787 Society,.  
788
- 789 Cuff, A. R., & Rayfield, E. J. (2015). Retrodeformation and muscular reconstruction of ornithomimosaurian  
790 dinosaur crania. *PeerJ*, 3, e1093.  
791
- 792 Davison, A. (1895). A contribution to the anatomy and phylogeny of *Amphiuma means* (Gardner). *Journal*  
793 *of Morphology*, 11(2), 375–410.  
794
- 795 Delp, S. L., & Loan, J. P. (1995). A graphics-based software system to develop and analyze models of  
796 musculoskeletal structures. *Computers in Biology and Medicine*, 25(1), 21–34.  
797
- 798 Diogo, R., Abdala, V., Aziz, M. A., Lonergan, N., & Wood, B. A. (2009). From fish to modern humans--  
799 comparative anatomy, homologies and evolution of the pectoral and forelimb musculature. *Journal of*  
800 *Anatomy*, 214(5), 694–716.  
801
- 802 Field, D. A. (1988). Laplacian smoothing and Delaunay triangulations. *Communications in Applied*  
803 *Numerical Methods*, 4(6), 709–712.  
804
- 805 Fischer, M. S. (1994). Crouched posture and high fulcrum, a principle in the locomotion of small  
806 mammals: The example of the rock hyrax (*Procavia capensis*) (Mammalia: Hyracoidea). *Journal of*  
807 *Human Evolution*, 26(5–6), 501–524.  
808
- 809 Fischer, M. S., Schilling, N., Schmidt, M., Haarhaus, D., & Witte, H. (2002). Basic limb kinematics of small  
810 therian mammals. *The Journal of Experimental Biology*, 205(Pt 9), 1315–1338.  
811
- 812 Fürbringer, M. (1900). Zur vergleichenden Anatomie des Brustschulterapparates und der  
813 Schultermuskeln. IV Teil. *Jena Ische Zeitschr. Naturwiss.* , Jena, 34, 351.  
814
- 815 Gambaryan, P. P., Kuznetsov, A. N., Panyutina, A. A., & Gerasimov, S. V. (2015). Shoulder girdle and  
816 forelimb myology of extant Monotremata. *Russian Journal of Theriology*, 14(1), 1–56.  
817
- 818 Gatesy, S. M. (1991). Hind limb movements of the American alligator (*Alligator mississippiensis*) and  
819 postural grades. *Journal of Zoology*, 224(4), 577–588.  
820
- 821 Gatesy, S. M., Baier, D. B., Jenkins, F. A., & Dial, K. P. (2010). Scientific rotoscoping: a morphology-  
822 based method of 3-D motion analysis and visualization. *Journal of Experimental Zoology. Part A,*  
823 *Ecological Genetics and Physiology*, 313(5), 244–261.  
824
- 825 George, R. M. (1977). The limb musculature of the Tupaiidae. *Primates; Journal of Primatology*, 18(1), 1–  
826 34.  
827
- 828 Gregory, W. K., & Camp, C. L. (1918). *Studies in comparative myology and osteology*. American Museum  
829 of Natural History.  
830
- 831 Grood, E. S., & Suntay, W. J. (1983). A joint coordinate system for the clinical description of three-  
832 dimensional motions: application to the knee. *Journal of Biomechanical Engineering*.  
833
- 834 Haines, R. W. (1942). THE EVOLUTION OF EPIPHYSES AND OF ENDOCHONDRAL BONE. *Biological*  
835 *Reviews of the Cambridge Philosophical Society*, 17(4), 267–292.  
836

- 837 Harvey, K. J., & Warburton, N. (2010). Forelimb musculature of kangaroos with particular emphasis on  
838 the tammar wallaby *Macropus eugenii* (Desmarest, 1817). *Australian Mammalogy*, 32(1), 1–9.  
839
- 840 Hildebrand, M. (1989). The quadrupedal gaits of vertebrates. *Bioscience*, 39(11), 766–775.  
841
- 842 Holliday, C. M. (2009). New insights into dinosaur jaw muscle anatomy. *Anatomical Record*, 292(9),  
843 1246–1265.  
844
- 845 Holliday, C. M., Ridgely, R. C., Sedlmayr, J. C., & Witmer, L. M. (2010). Cartilaginous epiphyses in extant  
846 archosaurs and their implications for reconstructing limb function in dinosaurs. *PLoS One*, 5(9).  
847 <https://doi.org/10.1371/journal.pone.0013120>  
848
- 849 Holmes, R. (1977). The osteology and musculature of the pectoral limb of small captorhinids. *Journal of*  
850 *Morphology*, 152(1), 101–140.  
851
- 852 Hoppe, H. (2008). Poisson Surface Reconstruction and Its Applications. In *Proceedings of the 2008 ACM*  
853 *Symposium on Solid and Physical Modeling* (pp. 10–10). New York, NY, USA: ACM.  
854
- 855 Hopson, J. A. (2015). Fossils, Trackways, and Transitions in Locomotion: A Case Study of Dimetrodon. In  
856 *Great Transformations in Vertebrate Evolution*.  
857
- 858 Howell, A. B. (1936). The phylogenetic arrangement of the muscular system. *The Anatomical Record*.  
859
- 860 Howell, A. B. (1937a). Morphogenesis of the Shoulder Architecture. Part V. Monotremata. *The Quarterly*  
861 *Review of Biology*, 12(2), 191–205.  
862
- 863 Howell, A. B. (1937b). The Swimming Mechanism of the Platypus. *Journal of Mammalogy*, 18(2), 217–  
864 222.  
865
- 866 Hutchinson, J. R., Anderson, F. C., Blemker, S. S., & Delp, S. L. (2005). Analysis of hindlimb muscle  
867 moment arms in *Tyrannosaurus rex* using a three-dimensional musculoskeletal computer model:  
868 implications for stance, gait, and speed. *Paleobiology*, 31(4), 676–701.  
869
- 870 Hutchinson, J. R., Rankin, J. W., Rubenson, J., Rosenbluth, K. H., Siston, R. A., & Delp, S. L. (2015).  
871 Musculoskeletal modelling of an ostrich (*Struthio camelus*) pelvic limb: influence of limb orientation on  
872 muscular capacity during locomotion. *PeerJ*, 3, e1001.  
873
- 874 Hutson, J. D., & Hutson, K. N. (2012). A test of the validity of range of motion studies of fossil archosaur  
875 elbow mobility using repeated-measures analysis and the extant phylogenetic bracket. *The Journal of*  
876 *Experimental Biology*, 215(Pt 12), 2030–2038.  
877
- 878 Hutson, J. D., & Hutson, K. N. (2014). A repeated-measures analysis of the effects of soft tissues on wrist  
879 range of motion in the extant phylogenetic bracket of dinosaurs: Implications for the .... *The Anatomical*  
880 *Record*. Retrieved from <http://onlinelibrary.wiley.com/doi/10.1002/ar.22903/full>  
881
- 882 Jenkins, F. A. (1970a). Cynodont postcranial anatomy and the “prototherian” level of mammalian  
883 organization. *Evolution; International Journal of Organic Evolution*, 230–252.  
884
- 885 Jenkins, F. A. (1970b). The Chañares (Argentina) Triassic reptile fauna VII. The postcranial skeleton of  
886 the traversodontid *Massetognathus pascuali* (Therapsida, Cynodontia). *Breviora*, 352, 1–28.  
887
- 888 Jenkins, F. A. (1989). Monotremes and the biology of Mesozoic mammals. *Netherlands Journal of*  
889 *Zoology*.  
890
- 891 Jenkins, F. A., & Goslow, G. E. (1983). The functional anatomy of the shoulder of the savannah monitor



- 892 lizard (*Varanus exanthematicus*). *Journal of Morphology*, 175(2), 195–216.  
893
- 894 Jenkins, F. A., Jr, & Parrington, F. R. (1976). The postcranial skeletons of the Triassic mammals  
895 *Eozostrodon*, *Megazostrodon* and *Erythrotherium*. *Philosophical Transactions of the Royal Society of*  
896 *London. Series B, Biological Sciences*, 273(926), 387–431.  
897
- 898 Jenkins, F. A. (1971a). *The postcranial skeleton of African cynodonts: problems in the early evolution of*  
899 *the mammalian postcranial skeleton*. Harvard MCZ.  
900
- 901 Jenkins, F. A. (1971b). Limb posture and locomotion in the Virginia opossum (*Didelphis marsupialis*) and  
902 in other non-cursorial mammals. *Journal of Zoology*, 165(3), 303–315.  
903
- 904 Jenkins, F. A. (1993). The evolution of the avian shoulder joint. *American Journal of Science*.  
905
- 906 Jenkins, F. A., & Weijs, W. A. (1979). The functional anatomy of the shoulder in the Virginia opossum  
907 (*Didelphis virginiana*). *Journal of Zoology*, 188(3), 379–410.  
908
- 909 Ji, Q., Luo, Z.-X., & Ji, S. A. (1999). A Chinese triconodont mammal and mosaic evolution of the  
910 mammalian skeleton. *Nature*, 398(6725), 326–330.  
911
- 912 Ji, Q., Luo, Z.-X., Yuan, C.-X., & Tabrum, A. R. (2006). A swimming mammaliaform from the Middle  
913 Jurassic and ecomorphological diversification of early mammals. *Science*, 311(5764), 1123–1127.  
914
- 915 Jouffroy, F. K. L., Saban, J., Souteyrand-Boulenger, R., Jouffroy, J., & Others. (1971). *Mammifères:*  
916 *musculature des membres, musculature peaucière, musculature des monotrèmes*. *Arthrologie*. Retrieved  
917 from [http://www.sidalc.net/cgi-](http://www.sidalc.net/cgi-bin/wxis.exe/?IsisScript=FCL.xis&method=post&formato=2&cantidad=1&expresion=mfn=001693)  
918 [bin/wxis.exe/?IsisScript=FCL.xis&method=post&formato=2&cantidad=1&expresion=mfn=001693](http://www.sidalc.net/cgi-bin/wxis.exe/?IsisScript=FCL.xis&method=post&formato=2&cantidad=1&expresion=mfn=001693)  
919
- 920 Kambic, R. E., Roberts, T. J., & Gatesy, S. M. (2014). Long-axis rotation: a missing degree of freedom in  
921 avian bipedal locomotion. *The Journal of Experimental Biology*, 217(Pt 15), 2770–2782.  
922
- 923 Kemp, T. S. (1978). Stance and gait in the hindlimb of a theriocephalian mammal-like reptile. *Journal of*  
924 *Zoology*, 186(2), 143–161.  
925
- 926 Kemp, T. S. (1980a). Aspects of the structure and functional anatomy of the Middle Triassic cynodont  
927 *Luangwa*. *J. Zool., Lond.*, 191, 193–239.  
928
- 929 Kemp, T. S. (1980b). The Primitive Cynodont *Procynosuchus*: Structure, Function and Evolution of the  
930 Postcranial Skeleton. *Philosophical Transactions of the Royal Society of London. Series B, Biological*  
931 *Sciences*, 288(1027), 217–258.  
932
- 933 Kemp, T. S. (2005). *The Origin and Evolution of Mammals*. OUP Oxford.  
934
- 935 Kirsch, J. A. W. (1973). *Notes for the dissection of the opossum, Didelphis virginiana*. Madison, WI.  
936
- 937 Lautenschlager, S. (2013). Cranial myology and bite force performance of *Erlikosaurus andrewsi*: a novel  
938 approach for digital muscle reconstructions. *Journal of Anatomy*, 222(2), 260–272.  
939
- 940 Leach, D. (1977). The forelimb musculature of marten (*Martes americana* Turton) and fishes (*Martes*  
941 *pennanti* Erxleben). *Canadian Journal of Zoology*, 55(1), 31–41.  
942
- 943 Liu, J. (2007). *New traversodontid materials from North Carolina, USA and the taxonomy, phylogeny of*  
944 *Traversodontidae (Synapsida: Cynodontia)*. COLUMBIA UNIVERSITY.  
945

- 946 Liu, J., & Abdala, F. (2014). Phylogeny and Taxonomy of the Traversodontidae. In C. F. Kammerer, K. D.  
947 Angielczyk, & J. Fröbisch (Eds.), *Early Evolutionary History of the Synapsida* (pp. 255–279). Springer  
948 Netherlands.
- 949
- 950 Liu, J., & Olsen, P. (2010). The Phylogenetic Relationships of Eucynodontia (Amniota: Synapsida).  
951 *Journal of Mammalian Evolution*, 17(3), 151–176.
- 952
- 953 Luo, Z.-X. (2007). Transformation and diversification in early mammal evolution. *Nature*, 450(7172),  
954 1011–1019.
- 955
- 956 Luo, Z.-X., Chen, P., Li, G., & Chen, M. (2007b). A new eutriconodont mammal and evolutionary  
957 development in early mammals. *Nature*, 446(7133), 288–293.
- 958
- 959 Luo, Z.-X. (2015). Origin of the Mammalian Shoulder. In *Great Transformations in Vertebrate Evolution*.  
960
- 961 McGowan, C. (1986). The wing musculature of the weka. *Gallirallus Australis*.
- 962
- 963 Meers, M. B. (2003). Crocodylian forelimb musculature and its relevance to Archosauria. *The Anatomical*  
964 *Record. Part A, Discoveries in Molecular, Cellular, and Evolutionary Biology*, 274(2), 891–916.
- 965
- 966 Meng, J., Hu, Y., Wang, Y., Wang, X., & Li, C. (2006). A Mesozoic gliding mammal from northeastern  
967 China. *Nature*, 444(7121), 889–893.
- 968
- 969 Miner, R. W. (1925). THE PECTORAL LIMB OF ERYOPS AND OTHER PRIMITIVE TETRAPODS.  
970 *Bulletin of the AMNH*, 51(7).
- 971
- 972 Mivart, S. G. (1869). Notes on the Myology of Menopoma alleghaniense. *Proceedings of the Zoological*  
973 *Society of London*, 37(1), 254–271.
- 974
- 975 Netter, F. H., Colacino, S., & Others. (1989). *Atlas of human anatomy* (Vol. 11). Ciba-Geigy Summit, NJ.  
976
- 977 Nyakatura, J. A., Allen, V. R., Lauströer, J., Andikfar, A., Danczak, M., Ullrich, H.-J., ... Fischer, M. S.  
978 (2015). A Three-Dimensional Skeletal Reconstruction of the Stem Amniote *Orobates pabsti*  
979 (Diadectidae): Analyses of Body Mass, Centre of Mass Position, and Joint Mobility. *PloS One*, 10(9),  
980 e0137284.
- 981
- 982 Oliveira, T. V. D., & Schultz, C. L. (2016). Functional Morphology and Biomechanics of the Cynodont  
983 *Trucidocynodon riograndensis* from the Triassic of Southern Brazil: Pectoral Girdle and Forelimb. *Acta*  
984 *Palaeontologica Polonica*, 61(2), 377–386.
- 985
- 986 Parsons, F. G. (1896). 4. Myology of Rodents.—Part II. An Account of the Myology of the Myomorpha,  
987 together with a Com parison of the Muscles of the various Suborders of Rodents. In *Proceedings of the*  
988 *Zoological Society of London* (Vol. 64, pp. 159–192). Wiley Online Library.
- 989
- 990 Peterson, J. A. (1973). *Adaptation for arboreal locomotion in the shoulder region of lizards*. University of  
991 Chicago Press.
- 992
- 993 Pierce, S. E., Clack, J. A., & Hutchinson, J. R. (2012). Three-dimensional limb joint mobility in the early  
994 tetrapod *Ichthyostega*. *Nature*, 486(7404), 523–526.
- 995
- 996 Polly, P. D. (2007). Limbs in mammalian evolution. *Fins into Limbs: Evolution, Development and*  
997 *Transformation*, 245–268.
- 998
- 999 Reilly, S. M., & Elias, J. A. (1998). Locomotion in alligator mississippiensis: kinematic effects of speed and  
1000 posture and their relevance to the sprawling-to-erect paradigm. *The Journal of Experimental Biology*, 201  
1001 (Pt 18), 2559–2574.

- 1002  
1003 Romer, A. S. (1922). The locomotor apparatus of certain primitive and mammal-like reptiles. *American*  
1004 *Museum of Natural History*.  
1005  
1006 Romer, A. S. (1924). Pectoral limb musculature and shoulder girdle structure in fish and tetrapods. *The*  
1007 *Anatomical Record*, 27(2), 119–143.  
1008  
1009 Romer, A. S. (1944). The development of tetrapod limb musculature—the shoulder region of Lacerta.  
1010 *Journal of Morphology*.  
1011  
1012 Romer, A. S., & Price, L. W. (1940). Review of the Pelycosauria. *Geological Society of America Special*  
1013 *Papers*, 28, 1–534.  
1014  
1015 Romer, A. S. (1956). *Osteology of the Reptiles*. 772 pp. University of Chicago Press, Chicago.  
1016  
1017 Romer, A. S. (1967). *The Chanares (Argentina) Triassic reptile fauna. III. Two New Gomphodonts,*  
1018 *Massetognathus Pascuali and M. Teruggii* (Vol. 264). Museum of Comparative Zoology.  
1019  
1020 Ruta, M., Botha-Brink, J., Mitchell, S. A., & Benton, M. J. (2013). The radiation of cynodonts and the  
1021 ground plan of mammalian morphological diversity. *Proceedings. Biological Sciences / The Royal*  
1022 *Society*, 280(1769), 20131865.  
1023  
1024 Simon, W. H. (1970). Scale effects in animal joints. I. Articular cartilage thickness and compressive  
1025 stress. *Arthritis and Rheumatism*, 13(3), 244–256.  
1026  
1027 Stein, B. R. (1981). Comparative Limb Myology of Two Opossums, Didelphis and Chironectes. *Journal of*  
1028 *Morphology*, (169), 113–140.  
1029  
1030 Stein, B. R. (1986). Comparative limb myology of four arvicolid rodent genera (mammalia, rodentia).  
1031 *Journal of Morphology*, 187(3), 321–342.  
1032  
1033 Sun, A., & Li, Y. (1985). The postcranial skeleton of the late tritylodont Bienotheroides. *Vertebrata*  
1034 *PalAsiatica*, 23(2).  
1035  
1036 Taylor, B. K. (1978). The anatomy of the forelimb in the anteater (Tamandua) and its functional  
1037 implications. *Journal of Morphology*, 157(3), 347–367.  
1038  
1039 Vaughan, T. A., Ryan, J. M., & Czaplewski, N. J. (2013). *Mammalogy*. Jones & Bartlett Learning, LLC.  
1040  
1041 Vickaryous, M. K., & Hall, B. K. (2006). Homology of the reptilian coracoid and a reappraisal of the  
1042 evolution and development of the amniote pectoral apparatus. *Journal of Anatomy*, 208(3), 263–285.  
1043  
1044 Walter, L. R. (1988). Appendicular Musculature in the Echidna, Tachyglossus-Aculeatus (Monotremata,  
1045 Tachyglossidae). *Australian Journal of Zoology*, 36(1), 65–81.  
1046  
1047 Walthall, J. C., & Ashley-Ross, M. A. (2006). Postcranial myology of the California newt, Taricha torosa.  
1048 *The Anatomical Record. Part A, Discoveries in Molecular, Cellular, and Evolutionary Biology*, 288(1), 46–  
1049 57.  
1050  
1051 Warburton, N. M., Grégoire, L., Jacques, S., & Flandrin, C. (2014). Adaptations for digging in the forelimb  
1052 muscle anatomy of the southern brown bandicoot (Isodon obesulus) and bilby (Macrotis lagotis).  
1053 *Australian Journal of Zoology*, 61(5), 402–419.  
1054  
1055 Watson, D. M. (1917). The Evolution of the Tetrapod Shoulder Girdle and Fore-limb. *Journal of Anatomy*,  
1056 52(Pt 1), 1–63.  
1057

- 1058 Witmer, L. M. (1995). The Extant Phylogenetic Bracket and the Importance of Reconstructing Soft  
1059 Tissues in Fossils. In J. Thomason (Ed.), *Functional Morphology in Vertebrate Paleontology*.  
1060
- 1061 Zaaf, A., Herrel, A., Aerts, P., & De Vree, F. (1999). Morphology and morphometrics of the appendicular  
1062 musculature in geckoes with different locomotor habits (Lepidosauria). *Zoomorphology*, 119(1), 9–22.  
1063  
1064  
1065  
1066  
1067  
1068  
1069  
1070  
1071



1072 **Supplementary Figure 1.** Three-dimensional reconstruction of the left pectoral limb of *M. pascuali*.  
1073 Reconstructed muscle origins/insertions are listed in legends of Figs. 4-8. This interactive PDF may be  
1074 viewed in Adobe Acrobat (Adobe Systems Incorporated, San Jose, CA, USA).

1075 **Table 1.** Pectoral limb joint range of motion in the cynodont *Massetognathus pascuali*. All measurements  
 1076 are made using 0.5mm joint space (see text for details).  
 1077

| Clavo-interclavicular  |                         |                         |                        |                      |                     |    |
|------------------------|-------------------------|-------------------------|------------------------|----------------------|---------------------|----|
| Z                      |                         |                         |                        |                      |                     |    |
| +/-medial rotation (°) | -/-lateral rotation (°) |                         |                        |                      |                     |    |
| 35                     | 35                      |                         |                        |                      |                     |    |
| Acromio-clavicular     |                         |                         |                        |                      |                     |    |
| Z                      |                         | Y                       |                        | X                    |                     |    |
| +/-medial roll (°)     | -/-lateral roll (°)     | +/-lateral yaw (°)      | -/-medial yaw (°)      | +/-cranial pitch (°) | -/-caudal pitch (°) |    |
| 35                     | 5                       | 20                      | 20                     | Unrestricted         | 5                   |    |
| Gleno-humeral          |                         |                         |                        |                      |                     |    |
| Z                      |                         | Y                       |                        | X                    |                     |    |
| +/-abduction (°)       | -/-adduction (°)        | +/-retraction (°)       | -/-protraction (°)     | +/-pronation (°)     | -/-supination (°)   |    |
| w/o translation        | 20                      | 20                      | 15                     | 15                   | 15                  | 25 |
| w/ translation         | 75                      | 45                      | 45                     | 45                   | 35                  | 35 |
| Humero-radial          |                         |                         |                        |                      |                     |    |
| Z                      |                         | Y                       |                        | X                    |                     |    |
| +/-extension (°)       | -/-flexion (°)          | +/-lateral rotation (°) | -/-medial rotation (°) | +/-adduction (°)     | -/-abduction (°)    |    |
| 90                     | 45                      | Unrestricted            | Unrestricted           | 40                   | 40                  |    |
| Humero-ulnar           |                         |                         |                        |                      |                     |    |
| Z                      |                         | Y                       |                        | X                    |                     |    |
| +/-extension (°)       | -/-flexion (°)          | +/-lateral rotation (°) | -/-medial rotation (°) | +/-adduction (°)     | -/-abduction (°)    |    |
| 80                     | 60                      | Unrestricted            | Unrestricted           | 30                   | 30                  |    |

1078  
 1079  
 1080

1081 **Table 2.** Extant Phylogenetic Bracket with muscle attachments and homologies. Abbreviations: sf.,  
 1082 surface; dc, deltopectoral crest  
 1083

|                                   | Urodela                                                                                                                          |                                                                                                                                                                   | Crocodylia                                               |                                                                                                                                                                                                                                                       | Rhynchocephalia                         |                                                                                                                                     | Squamata                                                                                                                             |                                                                                                                                           | Cynodontia                    |       | Monotremata                                                                                                                                                          |   | Theria                                                                                                                                                                                                                                                                        |   |                                                                                                                                                                                                           |
|-----------------------------------|----------------------------------------------------------------------------------------------------------------------------------|-------------------------------------------------------------------------------------------------------------------------------------------------------------------|----------------------------------------------------------|-------------------------------------------------------------------------------------------------------------------------------------------------------------------------------------------------------------------------------------------------------|-----------------------------------------|-------------------------------------------------------------------------------------------------------------------------------------|--------------------------------------------------------------------------------------------------------------------------------------|-------------------------------------------------------------------------------------------------------------------------------------------|-------------------------------|-------|----------------------------------------------------------------------------------------------------------------------------------------------------------------------|---|-------------------------------------------------------------------------------------------------------------------------------------------------------------------------------------------------------------------------------------------------------------------------------|---|-----------------------------------------------------------------------------------------------------------------------------------------------------------------------------------------------------------|
|                                   | Taricha: Walthall & Ashley-Ross (2006)<br>Amphystoma: Diogo et al. (2009)<br>Amphiuma: Davison (1895)<br>Mecynops: Mivart (1869) |                                                                                                                                                                   | Alligator, Crocodylus, Osteolemus, Gavialis: Mace (2015) |                                                                                                                                                                                                                                                       | Sphenodon: Holmes (1977); Mivart (1925) |                                                                                                                                     | Gekko: Zaaf et al. (1999)<br>Timon: Abdala & Diogo (2010)<br>Varanus: Jenkins & Goslow (1983)<br>Iguana: Holmes (1977); Romer (1922) |                                                                                                                                           | Massetognathus: Present study |       | Ornithorhynchus: Coues (1871); Gambaryan et al. (2015); Howell (1937a)<br>Tachyglossus: Walter (1988); Gambaryan et al. (2015)<br>Zaglossus: Gambaryan et al. (2015) |   | Didelphis: Jenkins & Weljs (1971)<br>Rusch (1973); Stein (1981); Coues (1871)<br>Wyman (1972)<br>Rattus: Parsons (1896)<br>Tupaia: George (1977)                                                                                                                              |   |                                                                                                                                                                                                           |
| <i>m. latissimus dorsi</i>        | + <sup>1</sup>                                                                                                                   | o dorsal fascia<br>i posterior sf. of humeral dc crest                                                                                                            | +                                                        | o thoracodorsal fascia<br>i anterodorsal sf. of humerus near m. teres major                                                                                                                                                                           | +                                       | o dorsal fascia<br>i posterodorsal sf. of proximal humerus                                                                          | +                                                                                                                                    | o thoracodorsal fascia<br>i posterodorsal sf. of proximal humerus                                                                         | +                             | (I)   | o thoracolumbar fascia<br>i ridge on dorsomedial sf. of humeral diaphysis                                                                                            | + | o thoracolumbar fascia<br>i posterior sf. of distal humerus, near entepicondyle                                                                                                                                                                                               | + | o thoracolumbar fascia<br>i posteromedial sf. of proximal humerus                                                                                                                                         |
| <i>m. pectoralis major</i>        | + <sup>2</sup>                                                                                                                   | o sternum and ventral fascia<br>i humeral dc crest                                                                                                                | + <sup>2</sup>                                           | o sternum and sternal ribs<br>i apex of humeral dc crest, near m. deltoideus clavicularis                                                                                                                                                             | + <sup>2</sup>                          | o sternum, interclavicle, clavicle, sternocostate<br>i posterior sf. of humeral dc crest                                            | +                                                                                                                                    | o lateral sf. of interclavicle, sternal ribs, and ventral midline fascia<br>i humeral dc crest                                            | +                             | (I)   | o all over ventral sf. of interclavicle<br>i humeral dc crest                                                                                                        | + | o interclavicle and ventral sf. of sternal ribs<br>i entire length of humeral dc crest                                                                                                                                                                                        | + | o sternum<br>i entire length of humeral dc crest                                                                                                                                                          |
| <i>m. pectoralis minor</i>        | -                                                                                                                                |                                                                                                                                                                   | -                                                        |                                                                                                                                                                                                                                                       | -                                       |                                                                                                                                     | -                                                                                                                                    |                                                                                                                                           | -                             | (II)  |                                                                                                                                                                      | + | o cranial 1/4 of abdominal midline<br>i humeral dc crest distal to M. pectoralis major insertion                                                                                                                                                                              | + | o xiphoid process of sternum<br>i proximal portion of humeral dc crest                                                                                                                                    |
| <i>m. deltoideus scapularis</i>   | + <sup>3</sup>                                                                                                                   | o dorsolateral sf. of scapula<br>i anterior sf. of humeral dc crest                                                                                               | +                                                        | o lateral sf. of scapula<br>i anterior sf. of humeral dc crest                                                                                                                                                                                        | +                                       | o lateral sf. of scapula<br>i along ridge on anterior sf. of humeral dc crest                                                       | +                                                                                                                                    | o lateral sf. of scapula<br>i anterodorsal sf. of proximal humerus                                                                        | +                             | (I)   | o cranial border of scapula<br>i humeral dc crest                                                                                                                    | + | o cranial border of scapula<br>i dorsal sf. of humeral dc crest                                                                                                                                                                                                               | + | o scapular spine<br>i humeral dc crest                                                                                                                                                                    |
| <i>m. deltoideus clavicularis</i> | + <sup>4</sup>                                                                                                                   | o dorsolateral sf. of scapula<br>i anterior sf. of humeral dc crest                                                                                               | +                                                        | o clavicle, cranio-lateral sf. of scapula around acromion process<br>i anterior sf. of humeral dc crest, distal to m. deltoideus scapularis                                                                                                           | +                                       | o clavicle<br>i along ridge on anterior sf. of humeral dc crest, adjacent to m. deltoideus scapularis                               | +                                                                                                                                    | o dorsal and ventral sf. of interclavicle, ventral 1/2 of proximal clavicle<br>i anterodorsal sf. of proximal humerus                     | +                             | (I)   | o flange along distal 1/2 of clavicle and area surrounding acromion<br>i humeral dc crest                                                                            | + | o ventral sf. of acromion, clavicle, and lateral process of interclavicle<br>i humeral dc crest                                                                                                                                                                               | + | o most of clavicle distal to sternoclavicular joint<br>i humeral dc crest                                                                                                                                 |
| <i>m. deltoideus acromialis</i>   | -                                                                                                                                |                                                                                                                                                                   | -                                                        |                                                                                                                                                                                                                                                       | -                                       |                                                                                                                                     | -                                                                                                                                    |                                                                                                                                           | -                             | (II)  |                                                                                                                                                                      | + | o posterior sf. of acromion<br>i anterodorsal sf. of humeral dc crest                                                                                                                                                                                                         | + | o acromion<br>i humeral dc crest                                                                                                                                                                          |
| <i>m. supraspinatus</i>           | -                                                                                                                                |                                                                                                                                                                   | -                                                        |                                                                                                                                                                                                                                                       | -                                       |                                                                                                                                     | -                                                                                                                                    |                                                                                                                                           | -                             | (III) | o rugosity on cranial scapular base and adjoining procoracoid<br>i proximal half of greater tubercle of humerus                                                      | + | o cranio-medial base of scapula<br>i greater tubercle of humerus                                                                                                                                                                                                              | + | o supraspinous fossa of scapula<br>i anterolateral sf. of greater humeral tubercle                                                                                                                        |
| <i>m. infraspinatus</i>           | + <sup>5</sup>                                                                                                                   | o ventrolateral sf. of coracoid<br>i humeral dc crest adjacent to m. pectoralis                                                                                   | + <sup>5</sup>                                           | o cranial tip of scapulo-coracoid, on both medial and lateral aspects of junction between scapula and coracoid<br>i apex of humeral dc crest                                                                                                          | + <sup>5</sup>                          | o cranio-lateral sf. of coracoid<br>i distal half of greater tubercle of humerus                                                    | + <sup>5</sup>                                                                                                                       | o lateral sf. of coracoid<br>i proximal margin of humeral dc crest and greater tubercle of humerus                                        | +                             | (I)   | o lateral sf. of scapula<br>i distal half of greater tubercle of humerus                                                                                             | + | o cranio-lateral sf. of scapula<br>i greater tubercle of humerus                                                                                                                                                                                                              | + | o infraspinous fossa of scapula<br>i lateral sf. of greater humeral tubercle                                                                                                                              |
| <i>m. teres minor</i>             | -                                                                                                                                |                                                                                                                                                                   | -                                                        |                                                                                                                                                                                                                                                       | -                                       |                                                                                                                                     | -                                                                                                                                    |                                                                                                                                           | -                             | (II)  | o rugosity on lateral scapular base<br>i ridge on dorsolateral sf. of proximal humerus                                                                               | + | o cranial border of scapula between acromion and glenoid fossa<br>i lesser tubercle of humerus                                                                                                                                                                                | + | o axillary border of scapula and adjacent infraspinous fossa<br>i lateral sf. of greater humeral tubercle                                                                                                 |
| <i>m. subcoracoscapularis</i>     | -                                                                                                                                | o medial sf. of scapulo-coracoid<br>i humerus                                                                                                                     | + <sup>6</sup>                                           | o medial sf. of scapula<br>i lesser tubercle of humerus                                                                                                                                                                                               | +                                       | o axillary border and medial sf. of coracoid<br>i lesser tubercle of humerus                                                        | +                                                                                                                                    | o medial sf. of coracoid and scapula<br>i lesser tubercle of humerus                                                                      | +                             | (I)   | o medial sf. of scapula and coracoid<br>i lesser tubercle of humerus                                                                                                 | + | o medial sf. of coracoid and procoracoid, caudolateral sf. of scapula<br>i lesser tubercle of humerus                                                                                                                                                                         | + | o subscapular fossa medial sf. of scapula<br>i lesser tubercle of humerus                                                                                                                                 |
| <i>m. teres major</i>             | -                                                                                                                                |                                                                                                                                                                   | +                                                        | o caudolateral sf. of scapula<br>i anterodorsal sf. of humerus near m. latissimus dorsi                                                                                                                                                               | -                                       |                                                                                                                                     | -                                                                                                                                    |                                                                                                                                           | -                             | (III) | o thickened axillary border of scapula<br>i ridge on dorsomedial sf. of proximal humerus                                                                             | + | o lateral sf. of caudal angle of scapula<br>i near lesser tubercle of humerus                                                                                                                                                                                                 | + | o caudal angle of scapula and dorsal border of scapular axillary border, sometimes extending onto adjacent infraspinous fossa<br>i short crest on posteromedial sf. of humeral diaphysis                  |
| <i>m. coracobrachialis</i>        | +                                                                                                                                | o caudolateral sf. of coracoid<br>i medial sf. of distal humerus extending to the entepicondyle                                                                   | +                                                        | o cranio-lateral sf. of scapula and coracoid<br>i ventral sf. of humerus proximal to dc crest                                                                                                                                                         | +                                       | o lateral sf. of coracoid and caudolateral tip of coracoid<br>i much of ventral sf. of humerus                                      | +                                                                                                                                    | o caudolateral and caudomedial sf. of coracoid<br>i humeral dc crest; much of anteroventral humeral diaphysis as far as the entepicondyle | +                             | (I)   | o two fossae on cranio-lateral and caudolateral sf. of coracoid<br>i ventromedial sf. of humeral diaphysis, along medial supracondylar ridge                         | + | o lateral sf. of procoracoid and lateral sf. of coracoid tip<br>i entire ventral sf. of humerus, extending to base of entepicondyle                                                                                                                                           | + | o coracoid process; supra-glenoid tube of scapula<br>i posteromedial sf. of humerus between subscapularis and latissimus dorsi insertions; humerus proximal entepicondyle, aka medial supracondylar ridge |
| <i>m. biceps brachii</i>          | + <sup>6</sup>                                                                                                                   | o medial sf. of distal humerus extending to the entepicondyle<br>i olecranon process of ulna                                                                      | +                                                        | o ventrolateral sf. of coracoid<br>i posterior sf. of proximal radius, near radial tuberosity                                                                                                                                                         | +                                       | o lateral sf. of coracoid caudal to m. supracoracoideus origin<br>i posterior sf. of proximal radius and ulna                       | +                                                                                                                                    | o lateral sf. of coracoid<br>i radial tuberosity of radius                                                                                | +                             | (I)   | o lateral sf. of procoracoid and lateral sf. of coracoid tip<br>i radial tuberosity of radius                                                                        | + | o ventral sf. of procoracoid and interclavicle; ventral sf. of caudal tip of coracoid<br>i posterior sf. of radius                                                                                                                                                            | + | o coracoid process; supra-glenoid tube of scapula<br>i radial tuberosity of radius                                                                                                                        |
| <i>m. triceps brachii</i>         | + <sup>7</sup>                                                                                                                   | o caudolateral sf. of coracoid; ventrolateral sf. of scapula; proximal 2/3 of lateral humeral sf.; entire posterior sf. of humerus<br>i olecranon process of ulna | +                                                        | o caudolateral sf. of scapula superior to glenoid fossa; caudomedial sf. of scapula and coracoid around glenoid fossa; three additional heads all over humeral diaphysis except ventral area occupied by m. brachialis<br>i olecranon process of ulna | +                                       | o caudal coracoid tendon; base of scapula; posterodorsal sf. of humerus; anterodorsal sf. of humerus<br>i olecranon process of ulna | +                                                                                                                                    | o caudal coracoid tendon; base of scapula; posterodorsal sf. of humerus; anterodorsal sf. of humerus<br>i olecranon process of ulna       | +                             | (I)   | o caudomedial sf. of scapula; medial sf. of coracoid tip; lateral sf. of humerus; dorsomedial sf. of humerus<br>i olecranon process of ulna                          | + | o lateral sf. of the scapula along crest running dorso-ventrally to the glenoid; posterodorsal sf. of proximal humerus from lesser tubercle to mid-diaphysis; posterodorsal sf. of distal humerus spanning from entepicondyle to entepicondyle<br>i olecranon process of ulna | + | o ventral portion of scapular axillary border; posterolateral sf. of proximal humeral diaphysis; posteromedial sf. of distal humeral diaphysis<br>i olecranon process of ulna                             |

1. As m. dorsohumeralis; 2. As m. pectoralis; 3. As m. dorsalis scapulae; 4. As m. procoracobrachialis; 5. As m. supracoracoideus; 6. As m. coracobrachialis; 7. As m. anconaeus; 8. As m. subscapularis

1087 **FIGURE CAPTIONS**

1088  
1089  
1090  
1091  
1092  
1093  
1094  
1095  
1096  
1097  
1098  
1099  
1100  
1101  
1102  
1103  
1104  
1105  
1106  
1107  
1108  
1109  
1110  
1111  
1112  
1113  
1114  
1115  
1116  
1117  
1118  
1119  
1120  
1121  
1122  
1123  
1124  
1125  
1126  
1127  
1128  
1129  
1130  
1131  
1132  
1133  
1134  
1135  
1136  
1137  
1138  
1139

**Figure 1.** Nodule containing the articulated remains of *Massetognathus pascuali* (MCZVP 3691) (A), with lateral (B) and medial (C) views of pectoral limb 3D surface models, prior to mesh refinement and repair. MCZVP, Museum of Comparative Zoology, Department of Vertebrate Paleontology, Harvard.

**Figure 2.** Cranial (A), lateral (B), and dorsal (C) views of the articulated left-side pectoral limb of *M. pascuali*, showing rotational axes and primitives used to determine centers of rotation. X, Y, and Z axes as labeled in Table 1. Axis colors: X-Red/Y-Green/Z-Blue.

**Figure 3.** Orthographic views of the pectoral limb of *M. pascuali* in an anatomically-neutral reference pose (not in vivo posture), with all joints rotated to the centers of their measured ranges of motion. The bones depicted comprise the bilateral scapulocoracoids, humeri, ulnae, and radii, as well as the median interclavicle. Line drawing of *Massetognathus* adapted from Figure 9 in Jenkins (1970b).

**Figure 4.** Orthographic views of the left humerus of *M. pascuali*, with reconstructed muscle origins/insertions. Abbreviations: cp, capitulum; dc, deltopectoral crest; ec, ectepicondyle; en, entepicondyle; fen, entepicondylar foramen; gt, greater tubercle; h, humeral head; lt, lesser tubercle; th, trochlea. Reconstructed muscles are listed in legend.

**Figure 5.** Repaired (A, B) and original (C, D) interclavicle of *M. pascuali* in ventral (A, C) and lateral (B, D) views, with reconstructed muscle origins/insertions. Reference images (E) adapted from Jenkins (1970b) (top, *Massetognathus*) and Jenkins (1971a) (bottom left *Thrinaxodon*, bottom right unidentified cynodont.) Abbreviations follow Jenkins (1971a): ap, anterior ridge; cc/con cl, concavity for clavicle articulation; lr, lateral ridge; pp, posterior ridge; pr, posterior ramus. Reconstructed muscles are listed in legend.

**Figure 6.** Orthographic views of the left clavicle of *M. pascuali*, with reconstructed muscle origins/insertions. Abbreviations: ca, concavity for articulation with acromion; cf, clavicular flange; st, rugose striations. Reconstructed muscles are listed in legend.

**Figure 7.** Orthographic views of the left scapulocoracoid of *M. pascuali*, with reconstructed muscle origins/insertions. Abbreviations: acr, acromion; axb, axillary border of scapula; c, coracoid (=metacoracoid *sensu* Vickaryous & Hall, 2006); cda, caudal angle of scapula; prc, procoracoid foramen; g, glenoid fossa; prc, procoracoid; rcb, reflected cranial border of scapula; sb, scapular base; sc, scapula; vb, vertebral border of scapula. Reconstructed muscles are listed in legend. Muscles are color-coded for visual differentiation, not homology.

**Figure 8.** Orthographic views of the left radius and ulna of *M. pascuali*, with reconstructed muscle origins/insertions. Note that the orientations for the radius are slightly rotated from Jenkins (1971a). Abbreviations: pr ar f, proximal articular facet; rt, radial tuberosity; rd nt, radial notch. Reconstructed muscles are listed in legend.

**Figure 9.** Potential pectoral limb excursion with fixed (A) and mobile (B) clavo-interclavicular and acromio-clavicular articulations. Neutral pose in white. Joint angles (protracted): [clavicle rotated medially 15°; scapulocoracoid yawed laterally 15°, rolled laterally 5°, pitched caudally 5°]; humerus adducted 20°, supinated 15°, protracted 15°; radius and ulna flexed 45°. Joint angles (retracted): [clavicle rotated laterally 15°; scapulocoracoid rolled medially 5°, pitched cranially 30°]; humerus pronated 10°, retracted 15°; radius and ulna extended 45°.

**Figure 10.** Close-up caudal (A), caudolateral (B) and ventrocaudolateral (C) views of the glenoid fossa of *M. pascuali*, showing the convex coracoid facet and the concave scapular facet.



A

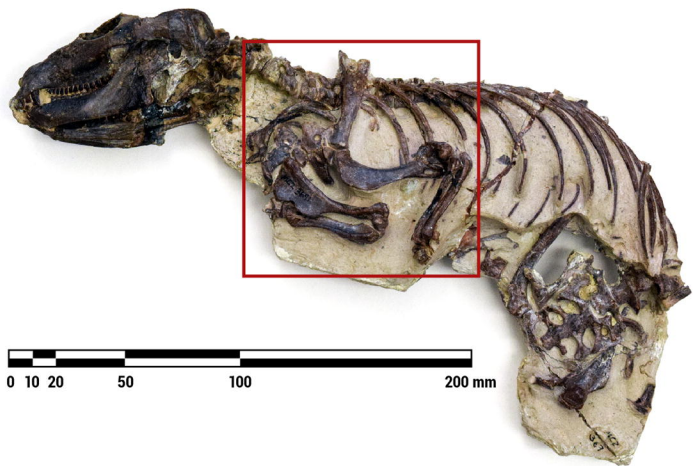

B

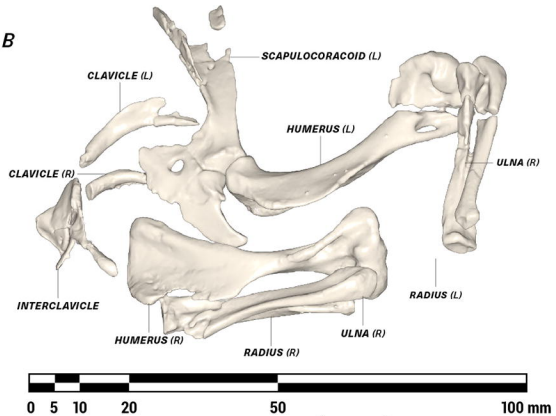

C

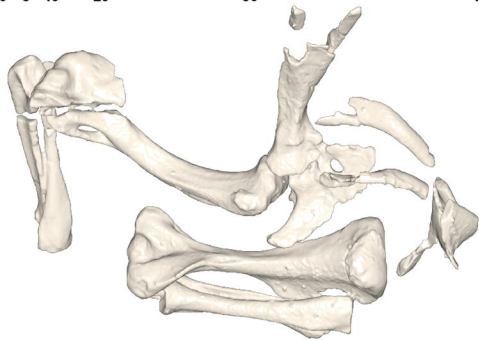

**A**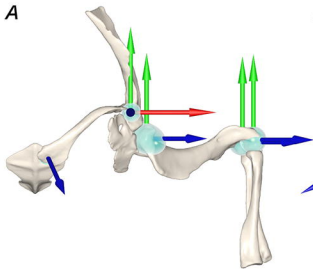**B**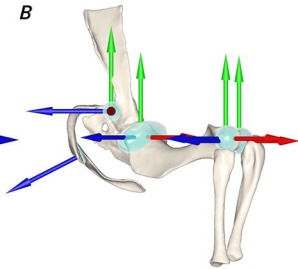**C**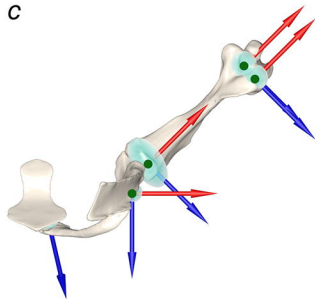

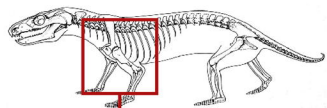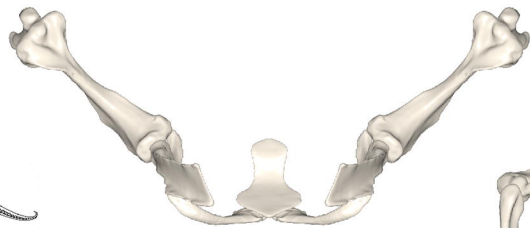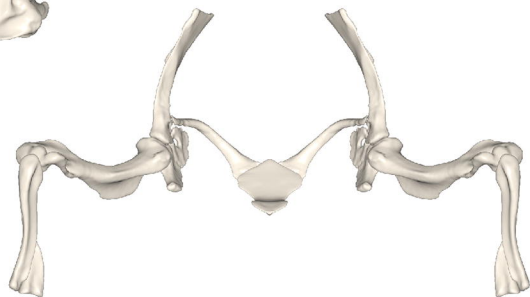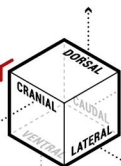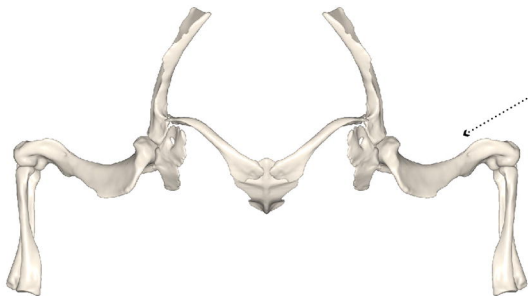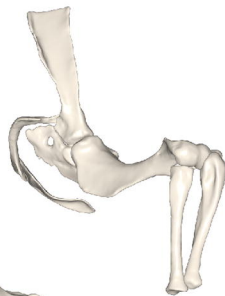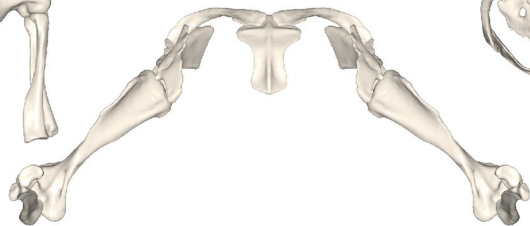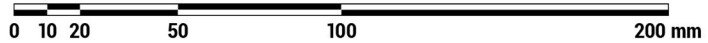

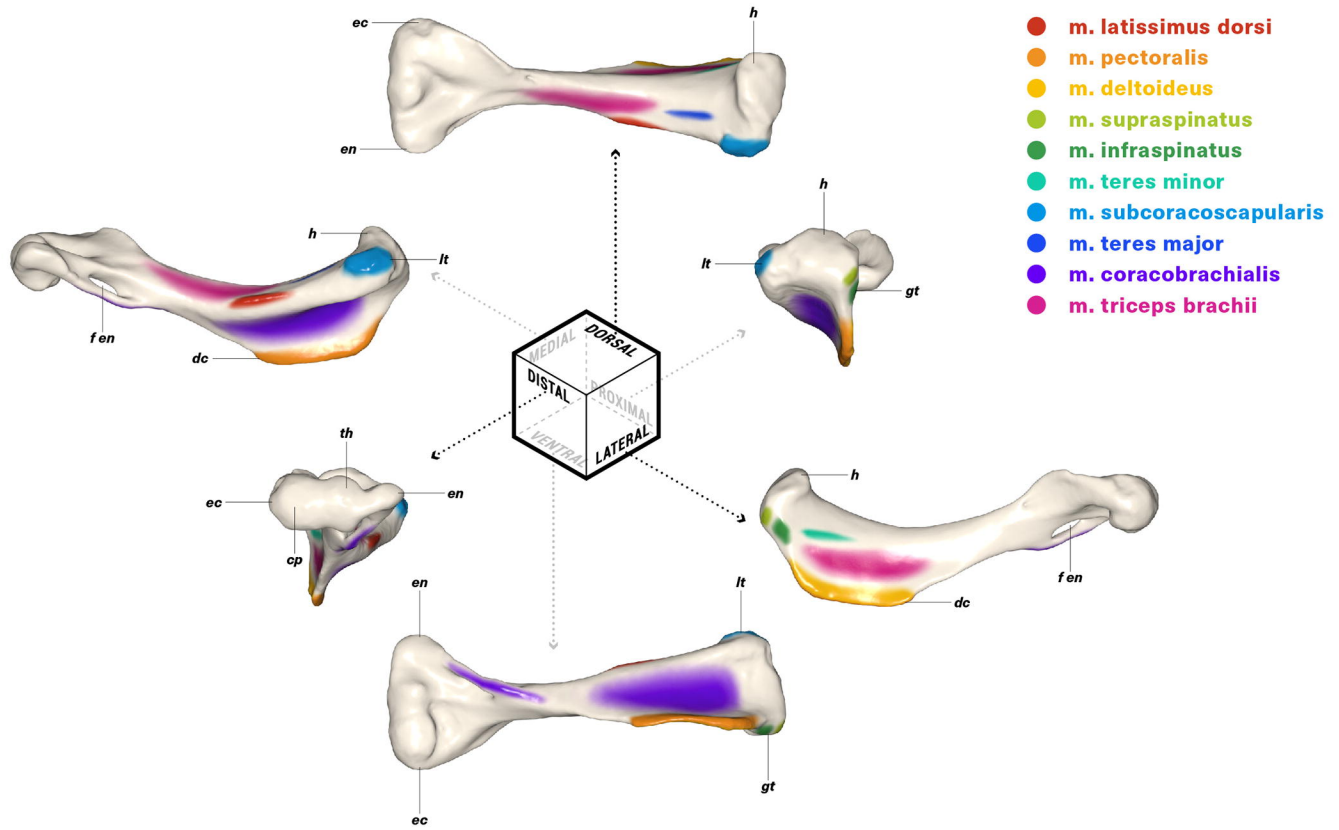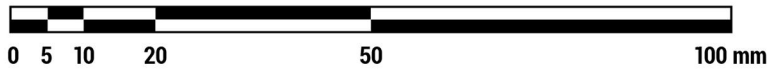



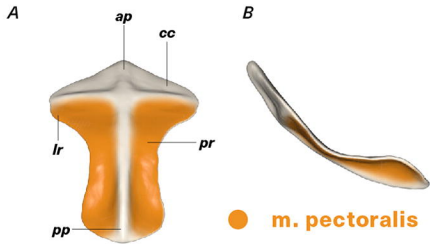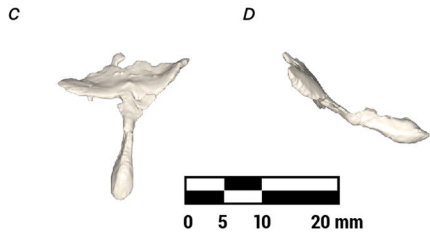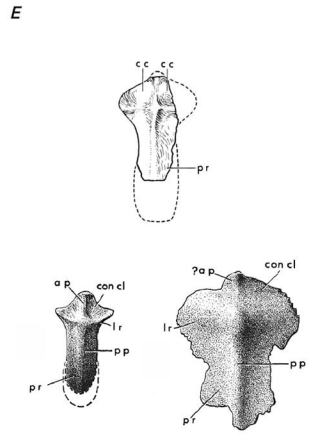

● *m. deltoideus*

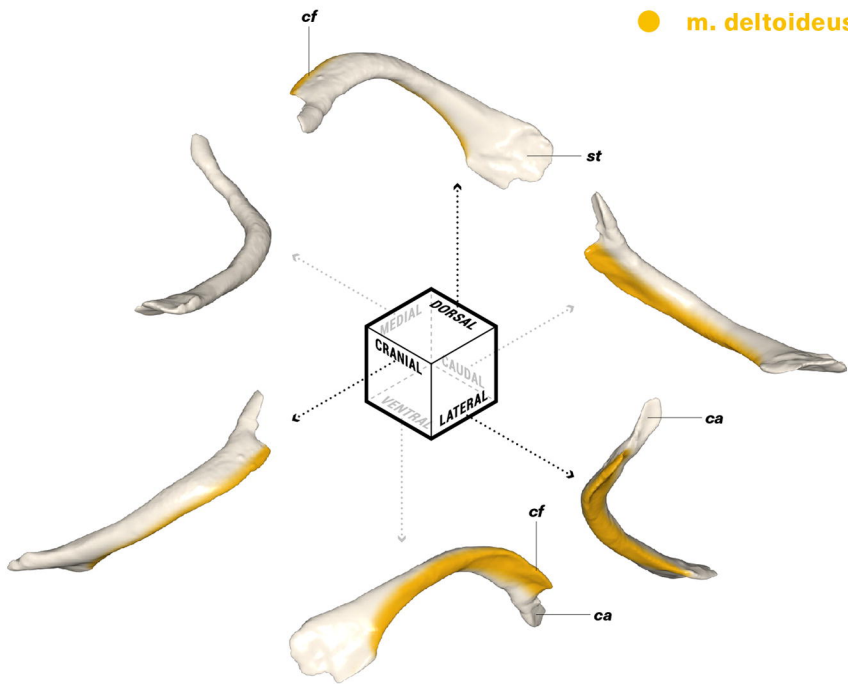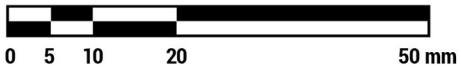

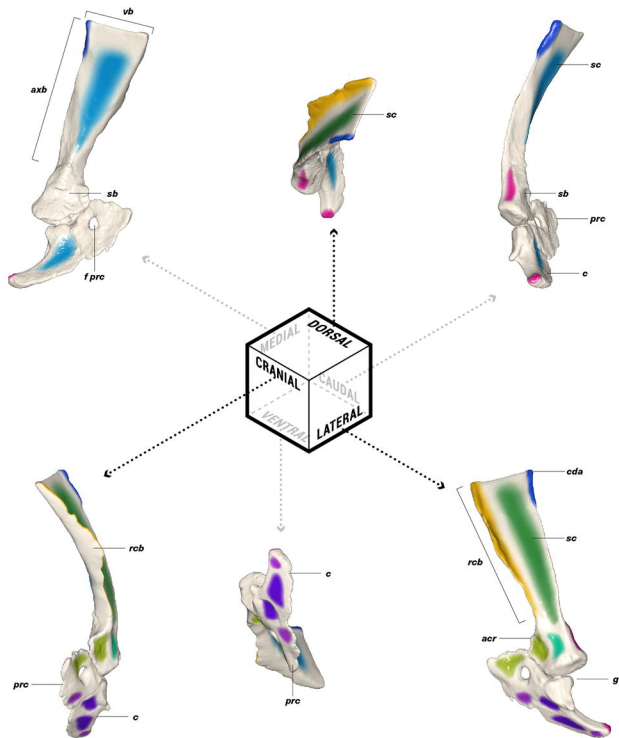

- **m. deltoideus**
- **m. supraspinatus**
- **m. infraspinatus**
- **m. teres minor**
- **m. subcoracoscapularis**
- **m. teres major**
- **m. coracobrachialis**
- **m. biceps brachii**
- **m. triceps brachii**

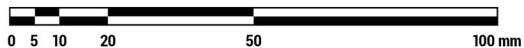

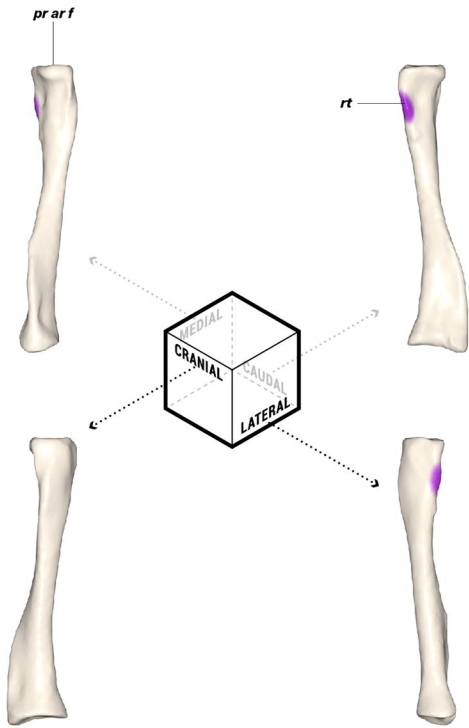

- **m. biceps brachii**
- **m. triceps brachii**

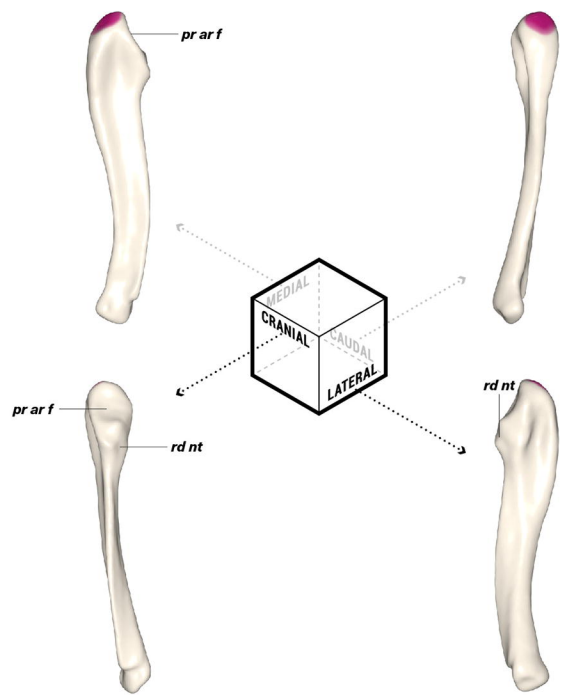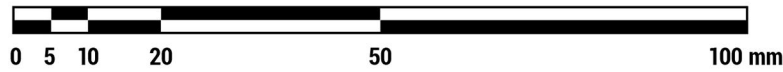



**A**

LATERAL

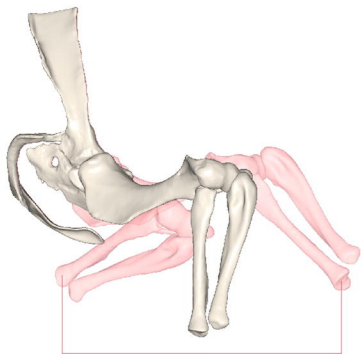**73.8 mm**

DORSAL

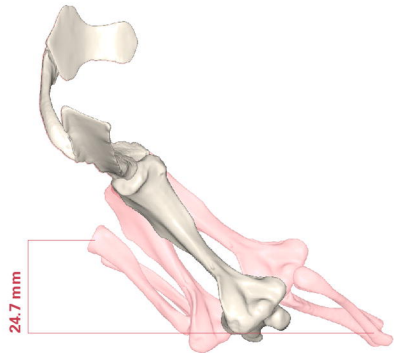**24.7 mm****B**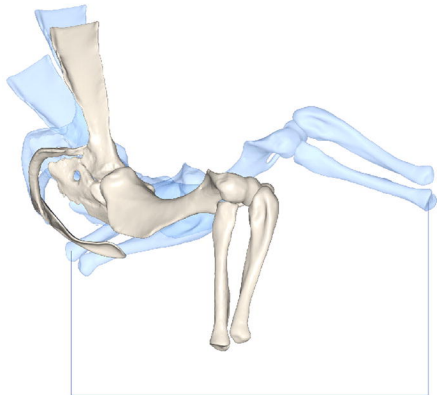**94.6 mm**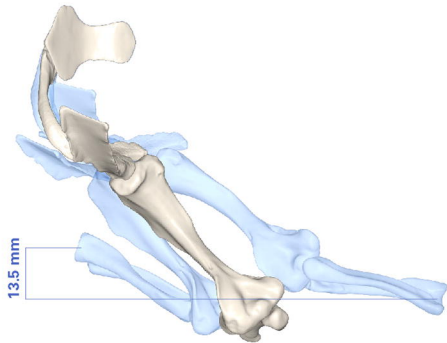**13.5 mm**

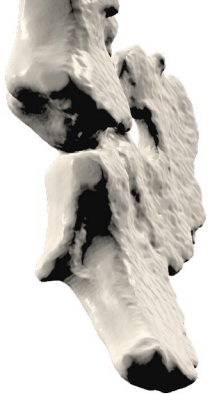

*A*

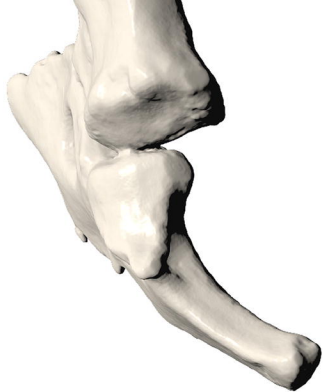

*B*

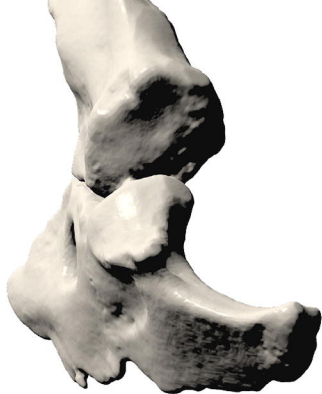

*C*
